1 **TITLE: Astrocytes drive divergent metabolic gene expression in humans and chimpanzees**

2

3 Trisha M. Zintel<sup>1,2</sup>, Jason Pizzollo<sup>1,2</sup>, Christopher G. Claypool<sup>3</sup>, Courtney C. Babbitt<sup>1,2,3</sup>

4

5

6 <sup>1</sup>Department of Biology, University of Massachusetts Amherst, Amherst, MA

7 <sup>2</sup>Molecular and Cellular Biology Graduate Program, University of Massachusetts Amherst, Amherst, MA

8 <sup>3</sup>Organismic and Evolutionary Biology, University of Massachusetts Amherst, Amherst, MA

9

10 Corresponding author:

11 Courtney C. Babbitt, Ph.D.

12 Dept. of Biology

13 611 North Pleasant St.

14 Amherst, MA, 01003, USA

15 413-545-5574

16 [cbabbitt@bio.umass.edu](mailto:cbabbitt@bio.umass.edu)

17

18

19

20 **KEYWORDS:** astrocytes, neurons, evolution, metabolism, genomics, brain

21 **ABSTRACT**

22           The human brain utilizes ~ 20% of all of the body's metabolic resources, while chimpanzee  
23 brains use less than 10%. Although previous work shows significant differences in metabolic gene  
24 expression between the brains of primates, we have yet to fully resolve the contribution of distinct brain  
25 cell types. To investigate cell-type specific interspecies differences in brain gene expression, we  
26 conducted RNA-Seq on neural progenitor cells (NPCs), neurons, and astrocytes generated from induced  
27 pluripotent stem cells (iPSCs) from humans and chimpanzees. Interspecies differential expression (DE)  
28 analyses revealed that twice as many genes exhibit DE in astrocytes (12.2% of all genes expressed) than  
29 neurons (5.8%). Pathway enrichment analyses determined that astrocytes, rather than neurons, diverged in  
30 expression of glucose and lactate transmembrane transport, as well as pyruvate processing and oxidative  
31 phosphorylation. These findings suggest that astrocytes may have contributed significantly to the  
32 evolution of greater brain glucose metabolism with proximity to humans.

## 33 INTRODUCTION

34           Though primates exhibit widespread variation in many phenotypes, including anatomy, behavior,  
35 and cognition, the extent of these phenotypic differences is not substantially larger than differences in  
36 genome sequence (A. Varki & Altheide, 2005; N. M. Varki & Varki, 2015). One of those traits that  
37 defines primates is a significantly larger brain relative to body size, for which humans exhibit the greatest  
38 amount of difference. Within primates, selective differences in the genome can be linked to diet and  
39 metabolism, suggesting selection has optimized different metabolic processes in lineage-dependent ways  
40 (Babbitt et al., 2010; Babbitt, Warner, Fedrigo, Wall, & Wray, 2011; Bauernfeind et al., 2015; Fagundes  
41 et al., 2007; Haygood, Babbitt, Fedrigo, & Wray, 2010; Schaffner et al., 2005; Stringer & Andrews,  
42 1988). The human brain is more energetically costly than that of other primates, utilizing ~ 20% of all of  
43 the body's metabolic resources, in comparison to non-human primate brains that use less than 10%  
44 (Hofman, 1983; Mink, Blumenschine, & Adams, 1981). Importantly, allometry alone does not explain the  
45 increase in human brain appropriation of glucose metabolism at this proportion (Karbowski, 2007;  
46 Martin, 1981; Yu, Karbowski, Sachdev, & Feng, 2014). There is evidence that sheer increase in neuron  
47 number can explain at least part of the energetic demand of the human brain (Herculano-Houzel, 2011).  
48 However, interspecies differences in the contribution of metabolism of astrocytes versus neurons to  
49 metabolic capacity at the organ level remain largely un-explored.

50           Many of these changes in brain metabolism have been hypothesized to coincide with other trait  
51 changes, particularly those related to shifts in diet known to be important in hominin evolution, such as an  
52 increase in meat products, increased quality of food, and agriculture (Aiello & Wheeler, 1995; Babbitt et  
53 al., 2011; F. Brown, Harris, Leakey, & Walker, 1985; McHenry, 1992, 1994; Peters, 2007; Shea, 2007).  
54 Furthermore, the expensive-tissue hypothesis posits that a trade-off in energy allocation occurred between  
55 energetically expensive or storing tissues for the development of a larger, metabolically demanding brain  
56 in primates, including a reduction in energetically expensive gut tissue (Aiello & Wheeler, 1995; Pontzer  
57 et al., 2014; Stearns, 1992; West, Brown, & Enquist, 2001) or a shift to investment in energy-storing  
58 tissue adipose tissue rather than energy-utilizing muscle tissue (Leonard & Robertson, 1994, 1997;

59 Leonard, Robertson, Snodgrass, & Kuzawa, 2003). There is evidence that the higher metabolic costs of  
60 the human brain influences the protracted development of body growth rate (Kuzawa et al., 2014). These  
61 *in vivo* (whole organism) studies further suggest an important link between evolutionary differences in  
62 metabolism and the uniqueness of the primate brain.

63         Similar to organism-level investigations, there is also molecular evidence supporting the  
64 evolution of metabolic processes (e.g. oxidative phosphorylation) in the primate brain with phylogenetic  
65 proximity to humans. Metabolism in the brain is critical for neurological function, as it provides cellular  
66 energy and critical biomolecules necessary for the complex cellular network characteristic of the brain  
67 (Bauernfeind & Babbitt, 2014; A. M. Brown, Wender, & Ransom, 2001; Nelson, Lehninger, & Cox,  
68 2008; Raichle, 2010; Tekkök, Brown, Westenbroek, Pellerin, & Ransom, 2005; Vander Heiden, Cantley,  
69 & Thompson, 2009; Vander Heiden et al., 2010). Cellular metabolism involves the breakdown of fuel  
70 molecules to produce energy or other molecules through multiple interconnected pathways, including  
71 glycolysis, oxidative phosphorylation, and the pentose phosphate pathway. Enrichments for metabolic  
72 processes in genes and gene regulatory regions undergoing positive selection is a common thread in gene  
73 expression analyses from whole primate brain tissue (Babbitt et al., 2010; Bauernfeind et al., 2015;  
74 Haygood et al., 2010; Haygood, Fedrigo, Hanson, Yokoyama, & Wray, 2007; Kosiol et al., 2008; Uddin  
75 et al., 2008). Interestingly, there are lineage-dependent differences in the specific pathways enriched in  
76 each species (e.g. glucose and carbohydrate metabolism in humans and glycogen and acyl-CoA  
77 metabolism in chimpanzees) (Haygood et al., 2007; Kosiol et al., 2008; Uddin et al., 2008). Within  
78 anthropoids, genes encoding the subunits of cytochrome c oxidase, the final component of the electron  
79 transport chain, show an accelerated rate of evolution in their sequences compared with any other  
80 placental mammals (Grossman, Schmidt, Wildman, & Goodman, 2001; Uddin et al., 2008; Wildman,  
81 Wu, Goodman, & Grossman, 2002; Wu, Goodman, Lomax, & Grossman, 1997). These molecular  
82 changes suggest increased control over the mechanisms that process glucose (Goldberg et al., 2003;  
83 Grossman et al., 2001; Grossman, Wildman, Schmidt, & Goodman, 2004; Hüttemann et al., 2012; Uddin  
84 et al., 2008). Further understanding the relationship between genetic changes (both in coding and non-

85 coding regulatory portions of the genome) and observed metabolic differences in primates will contribute  
86 to a greater understanding of proximate influences on larger evolutionary trends in primates. These  
87 findings also highlight a need to investigate not only glucose metabolism and energy production but also  
88 that of other macromolecules (e.g. lipids, amino acids, nucleic acids) for a more comprehensive  
89 understanding of differences in cellular metabolism in neural cells of primates.

90 Many previous comparative primate studies using functional genomics have determined  
91 significant differences in expression between humans, chimpanzees, and other primate species (primarily,  
92 rhesus macaque) (Babbitt et al., 2010; Bakken et al., 2015; Bauernfeind et al., 2015; Blekhman, Oshlack,  
93 Chabot, Smyth, & Gilad, 2008; Khaitovich et al., 2004; Konopka et al., 2012; Oldham, Horvath, &  
94 Geschwind, 2006). However, as many investigations of primate evolution and humans in particular often  
95 are, these studies have been largely limited to utilizing post-humous tissue samples, oftentimes  
96 opportunistically obtained. Recent advances in induced pluripotent stem cell (iPSC) technology have  
97 allowed for the generation of iPSC-derived mature brain cells and organoids as *in vitro* models of primate  
98 brain development. There have been a number of studies using iPSCs to generate brain organoids as an *in*  
99 *vitro* model for brain development (Amiri et al., 2018; Camp et al., 2015; Luo et al., 2016; Velasco et al.,  
100 2019), including one comparative study between humans, chimpanzees, and rhesus macaques (Kanton et  
101 al., 2019). The use of iPSC-derived samples has shown great promise in understanding brain development  
102 and function in greater detail. While monolayer culturing of iPSC-derived cells does not recapitulate the  
103 complexity of the primate brain as well as brain organoids, they are far more feasible in both cost and  
104 time, and have been used extensively to investigate brain cell-type specific mechanisms of disease (Cho,  
105 Yang, Forest, Qian, & Chan, 2019; di Domenico et al., 2019; Penney, Ralvenius, & Tsai, 2019; Zhao et  
106 al., 2017).

107 The findings of interspecies divergence in brain metabolism are intriguing, however, a cell-type  
108 specific comparison would more fully inform our understanding of distinct cellular contributions to  
109 interspecific differences in neurological function (I. G. Romero et al., 2015). Two of the major cell types  
110 in the brain are neurons and astrocytes. Neurons function in neurological processes like cognition and

111 perception largely by transmitting chemical and electrical signals throughout complex cellular networks.  
112 However, metabolic programs have been shown to shift as neural progenitor cells (NPCs) differentiate  
113 into more mature cell types (Zheng et al., 2016). Non-dividing, mature neurons are known to have very  
114 little capacity for specific metabolic processes (e.g. glycolysis) and rely on metabolite shuttling from  
115 another cell type, astrocytes (Almeida, Moncada, & Bolaños, 2004; Herrero-Mendez et al., 2009; Sonntag  
116 et al., 2017). Astrocytes, despite being the most abundant cell-type in the central nervous system  
117 (Nedergaard, Ransom, & Goldman, 2003), have traditionally been considered support cells for neurons  
118 without significant relevance to neural function. However, recent work has determined critical roles of  
119 astrocytes in neural function including provisioning of metabolites to neurons for energy (Mächler et al.,  
120 2016; Pellerin & Magistretti, 1994; Volkenhoff et al., 2015) and enhancing synaptic processes (Diniz et  
121 al., 2012; Meyer-Franke, Kaplan, Pfeifer, & Barres, 1995). These findings point to a need to characterize  
122 the important differences among a variety of cell types, not only in neurons, but in other metabolically-  
123 relevant brain cell types such as astrocytes between species to understand how the primate brain has  
124 evolved.

125         We hypothesize that there are important cell-type specific metabolic changes between human and  
126 chimpanzee brains and that astrocytes contribute, at least in part, to these differences. To investigate these  
127 changes, we used established protocols for the differentiation of induced pluripotent stem cells (iPSCs)  
128 into mature, functional neurons and astrocytes from humans and chimpanzees from multipotent neural  
129 progenitor cells (NPCs). This comparative cell culture approach allowed us to assess each cell type in the  
130 absence of other cell types in a defined, controlled environment. In order to determine adaptive  
131 interspecies differences in gene expression and metabolism in cell-type specific manner, we conducted  
132 RNA-Seq on human and chimpanzee NPCs, neurons, and astrocytes. We determined significant  
133 interspecies differential expression in all three cell types with the greatest degree of difference in  
134 astrocytes. Pathway enrichments revealed significant differences in cellular respiration between species  
135 across all cell types as well as cell-type specific changes in glucose and lactate transmembrane transport  
136 and pyruvate utilization suggestive of a higher capacity for energetic, rather than biosynthetic, metabolic

137 phenotypes in human astrocytes. This work demonstrates a putative cell-type specific mechanism by  
138 which astrocytes may contributed substantially to the adaptive metabolic capacity of the human brain. It  
139 also contributes to a growing number of studies demonstrating the importance of considering astrocytes in  
140 presumably human-specific phenotypes, including neurodegenerative diseases.

141

## 142 **RESULTS**

143

### 144 **RNA-Seq of human and chimpanzee iPSC-derived neural cells.**

145 We took a comparative genomics approach to investigating interspecies differences in neural cell-  
146 type specific gene expression between humans and chimpanzees. Three cell lines per species,  
147 representing three individuals, were used. These cell lines were originally obtained as fibroblasts from  
148 minimally invasive skin biopsies, reprogrammed into iPSCs, and have been validated for their  
149 pluripotency and differentiation abilities (Blake et al., 2018; Burrows et al., 2016; Eres, Luo, Hsiao,  
150 Blake, & Gilad, 2019; Pavlovic, Blake, Roux, Chavarria, & Gilad, 2018; I. G. Romero et al., 2015; Ward  
151 & Gilad, 2019; Ward et al., 2018). iPSCs from both species were initially cultured in the defined, iPSC-  
152 specific media mTeSR1 (STEMCELL, Vancouver, Canada). In order to investigate interspecies  
153 differences in cell-type specific gene expression between humans and chimpanzees, we generated RNA-  
154 Seq data from human and chimpanzee neural progenitor cells (NPCs), neurons, and astrocytes from  
155 induced pluripotent stem cells (iPSCs) (Figure 1A).

156 To confirm that expression profiles of our iPSC-derived neural samples resembled that of neural  
157 tissue and primary neural cells, we used previously published data from human and chimpanzee tissues,  
158 including brain (Brawand et al., 2011), as well as human primary neurons and astrocytes (Materials &  
159 Methods) (Zhang et al., 2016). We visualized these data in an MDS plot and observed that our iPSC-  
160 derived neural samples clustered together within the same dimensional space as the other neural tissue  
161 and cell samples and not the non-neuronal tissue samples (SI Figure 5). These clustering analyses, in  
162 addition to *in vitro* validation of cell type by cell-type marker IHC prior to sequencing, demonstrate that  
163 we successfully created and obtained total transcriptome data of iPSC-derived NPCs, neurons, and

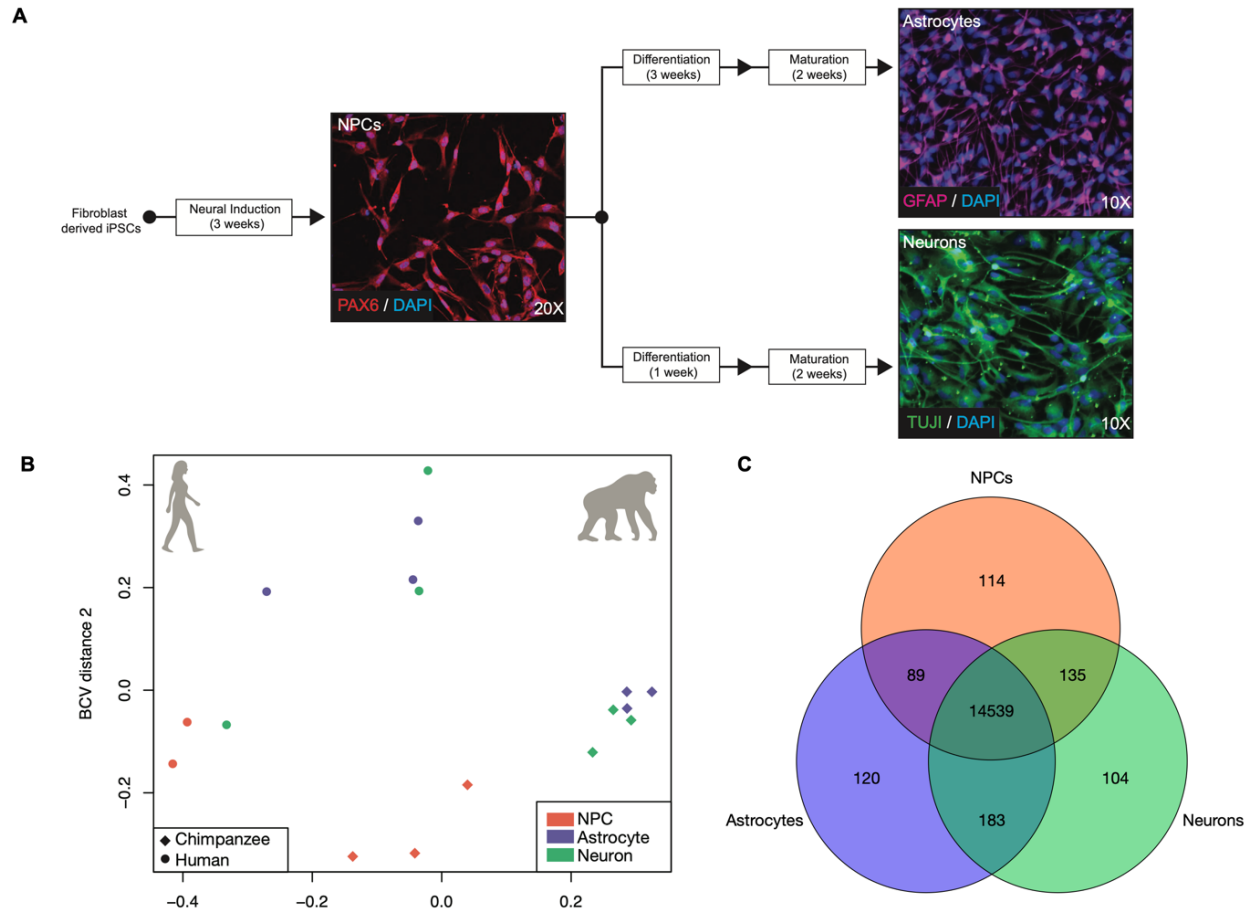

164

165 **Figure 1 | Patterns of gene expression variation of iPSC-derived neural cells from humans and**  
166 **chimpanzees.** A) The differentiation schematic and representative immunofluorescent photos of iPSC-  
167 derived neural progenitor cells (NPCs; line H28815) stained with PAX6, astrocytes (line C3649K) stained  
168 with GFAP, and neurons (line C4955) stained with TUJ1. B) A PCoA of the iPSC-derived NPCs,  
169 neurons, and astrocytes transcriptomes. C) A Venn diagram of the overlap in expression across cell types.  
170 Further details for samples are included in SI Table 1.  
171



172 astrocytes from humans and chimpanzees relevant for comparative assessments of cell-type specific  
173 interspecies gene expression differences.

174  
175 **Astrocytes exhibit the greatest degree of differential expression between human and chimpanzee**  
176 **neural cell types**

177 We next performed differential expression (DE) analyses in order to determine significantly  
178 differentially expressed genes between species. However, given the lack of clear distinction among our  
179 different cell types (Figure 1B), we first wanted to determine the degree of shared expression across all  
180 cell types. To do so, we determined overlap among cell types for genes with at least one count in one or  
181 more cell lines per cell type (Figure 1C). Of the total genes expressed in NPC (n=14,877), neuron  
182 (n=14,961), and astrocyte (n=14,931) samples, 95.13% (n=14,536) were shared among all three cell types  
183 (Figure 1C). This is consistent with previous findings that relatively few genes are cell-type specific in the  
184 brain, in terms of absolute expression (Magistretti & Allaman, 2015; McKenzie et al., 2018).

185 For DE analyses, we first conducted an analysis of variance (ANOVA)-like test for differentially  
186 expressed genes in a species (SP) by cell-type (CT) manner using edgeR (Robinson, McCarthy, & Smyth,  
187 2010). We reasoned that this would be the most evolutionarily relevant set of genes for investigating  
188 neural cell-type specific “trade-offs” in expression between species. Using edgeR’s generalized linear  
189 model (GLM) functionality and a quasi-likelihood F-test for significant differential expression, we found  
190 4,007 significantly differentially expressed genes in a species by cell type manner (26.22% of all  
191 expressed genes). However, at present, there are no post-hoc tests for an ANOVA-like test for differential  
192 expression, and so this analysis is limited in that it cannot delineate which samples (cell types) these  
193 genes are significantly DE in (Robinson et al., 2010). The ANOVA-like test for differences also requires  
194 an initial filtering of lowly expressed genes across all samples, which eliminates the 104-120 genes (0.68-  
195 0.79%, Figure 1C) expressed only in one cell type (CT-specific genes). For these reasons we also  
196 conducted interspecies pairwise DE comparisons for each CT (hereafter referred to as CT-DE analyses).

197 While these CT-specific genes are relatively few in number, they likely have an important role in cellular  
198 function, and thus we did not want to exclude them from our interspecies CT-DE comparisons.

199 For CT-DE comparisons, the only genes included were those counts above zero in all samples per  
200 CT and were further filtered to those with counts per million (CPM) > 1 in at least 1 sample, resulting in  
201 11,772 genes in NPCs, 12,451 genes in neurons, and 12,302 genes in astrocytes. We used the same GLM  
202 quasi-likelihood F-test to determine that 8.57% (n=1,294) of genes are differentially expressed between  
203 species' NPCs, 5.8% (n=886) between neurons, and 12.2% (n=1,865) between astrocytes (Figure 2A, SI  
204 Figure 6). Many of these significantly differentially expressed genes in CT-DE comparisons overlapped  
205 with the SPxCT ANOVA-like differentially expressed genes (SI Table 3). When we determined overlap  
206 in differentially expressed genes between species across all three cell types, we found that, similar to  
207 global expression, a large number of genes were determined as differentially expressed between species  
208 in all three cell types (n=594, Figure 2B). However, there are far more genes that uniquely differentiate  
209 astrocyte gene expression between species (n=924) than NPCs (n=395) and neurons (n=100) (Figure 2B).  
210 This suggests that neuronal gene expression is more conserved across species in NPCs and neurons, and  
211 that astrocytes do indeed contribute to important interspecies differences in neural gene expression.

212

### 213 **Interspecies differences in gene expression are largely due to differential metabolic signaling** 214 **skewed toward higher expression in humans regardless of cell type**

215 We then used categorical enrichment analyses to determine what biological processes are over-  
216 represented (enriched) or under-represented (“conserved”) in interspecies differentially expressed genes  
217 by cell type (CT) (SI Table 4). There were consistently a larger number of interspecies differentially  
218 expressed genes per CT-DE comparison with higher expression in human cells (765 in NPCs, 496 in  
219 neurons, and 1,078 in astrocytes) than chimpanzee cells (529 in NPCs, 390 in neurons, and 787 in  
220 astrocytes) (Figure 2A). We used these six higher-in-one-species split DE gene lists in a mutliquery  
221 categorical enrichment analyses for under- and over-represented processes using gProfiler’s categorical  
222 enrichment tool (gOST) (Raudvere et al., 2019). Likely in part due to the larger number of genes with

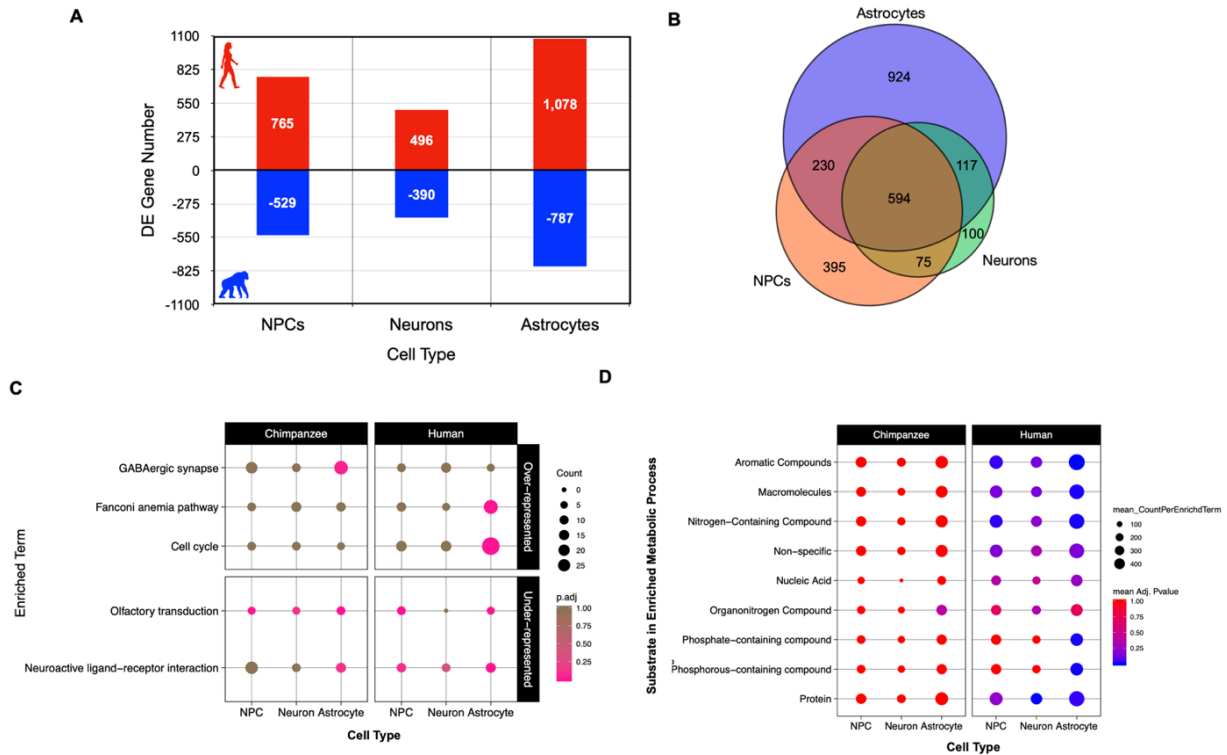

223

224 **Figure 2 | Astrocytes demonstrate the most significant differences in gene expression between human and**  
 225 **chimpanzee neural cell types for metabolic but not neuron-specific pathways.** A) Counts of genes  
 226 exhibiting differential expression at an FDR < 5% between species for each cell type and the direction of  
 227 higher expression for each CT-DE comparison (red/positive – higher expression in human; blue/negative  
 228 – higher expression in chimpanzee). B) A Venn diagram of overlap in genes per cell type exhibiting  
 229 differential expression between species. C) Plot of significantly ( $EASE < .05$ ) over-represented (top  
 230 panel) and under-represented (bottom panel) KEGG pathways determined by categorical enrichment  
 231 analyses (full results in SI Table 4). Size indicates the count of genes per pathway while color indicates  
 232 the adjusted p-value (pink – lower/significant, brown – higher/non-significant). D) Plot of significantly  
 233 over-represented categories of GO BP terms determined by categorical enrichment analyses. (full results  
 234 in SI Table 4). The categories (y-axis) represent groupings of multiple GO BP terms related to the  
 235 metabolism of the indicated substrates/macromolecules. Size indicates the mean count and color indicates  
 236 the mean adjusted enrichment p-value for all terms in that category. Refer to SI Table 4 and Methods for  
 237 individual GO BP terms included in each category.  
 238

239 higher expression in human for all CT's, there was consistently far more processes enriched in human  
240 CTs than chimpanzee CTs (SI Table 4).

241 Human and chimpanzee neural cells exhibited significant under-representation of the KEGG  
242 pathways 'olfactory transduction' and 'neuroactive ligand-receptor interaction' (Figure 2C).  
243 Consistently, both species' also showed significant under-representation of GO biological processes (BP)  
244 terms related to development, immune function, and intracellular signaling (SI Figure 8). Human cells  
245 were under-represented for some extracellular and membrane associated cellular components (CC) (SI  
246 Figure 9) as well as molecular functions related to cytokine and receptor activity (primarily in astrocytes;  
247 SI Figure 10). Both species cells were underrepresented for nucleic acid binding and G-protein coupled  
248 receptor and transducer activity (SI Figure 10). This demonstrates that signaling, including some  
249 neuronal-specific signaling such as neuroactive ligand receptor interaction, and downstream perception  
250 processes (e.g. olfaction) are conserved across species for all cell-types.

251 As for significantly over-represented processes in differentially expressed genes between species,  
252 cell division, cytoskeletal and developmental signaling, and response to external stimuli terms were  
253 significantly over-represented in human astrocytes, transcription was enriched in human NPCs, and  
254 protein modification was enriched most significantly in human neurons (SI Figure 8). Because the human  
255 brain is so energetically demanding, we were specifically interested how pathways involved in cellular  
256 respiration and metabolism differed between species. Metabolic processes targeting a variety of substrates  
257 or macromolecules were enriched primarily in human cells (summarized in Figure 2D, full results in SI  
258 Table 4). Human astrocytes were significantly enriched for several more metabolic biological processes  
259 than human NPCs and neurons that included metabolism of phosphate-containing compounds as well as  
260 more generally for metabolism of macromolecules (Figure 2D). We also investigated enrichment of GO  
261 cellular component (CC) terms to determine if there were differences in expression of specific neuronal  
262 parts. Over-represented CC terms in human astrocytes were similar to the GO BP over-represented  
263 processes (cytoplasm, cytoskeleton, cell division and growth; SI Figure 9). Human neurons were enriched  
264 for terms related to intracellular macromolecule modification and trafficking (SI Figure 9B). Interestingly,

265 human astrocytes were enriched for molecular functions (MFs) related generally to substrate binding,  
266 specifically, to ATP, carbohydrates and their derivatives, enzymes, and nucleic acids (SI Figure 10A).  
267 Human neurons were enriched for ubiquitin-related molecular activity, and human astrocytes for  
268 molecular activity related generally to ATPases, catalysis, exonucleases, helicases, kinases, and  
269 phosphotransferases (SI Figure 10B). These results indicate that metabolic processes differ between  
270 species in a CT-specific manner, and that all human neural cell types exhibit increased expression for a  
271 variety of macromolecular metabolic processes more than chimpanzee neural cells. Further, we see that  
272 there are significant differences in molecular functions important in cellular metabolic signaling.

273

#### 274 **Human and chimpanzee neural cells differ in glucose and lactate transport as well as oxidative** 275 **phosphorylation**

276 Our results showed that when using unbiased categorical enrichment analyses without *a priori*  
277 expectations of enriched terms, metabolic processes targeting a variety of substrates or macromolecules  
278 were enriched in human neural cell types. However, very few of these processes were for pathways  
279 involved in cellular respiration resulting in production of energy in the form of ATP. There are known  
280 differences in metabolic capacity between neurons and astrocytes, including that astrocytes are  
281 characterized metabolically by high aerobic glycolytic activity (increased glycolysis with limited potential  
282 for oxidative ATP production) while neurons typically favor energy production and oxidative  
283 phosphorylation (reviewed in Magistretti & Allaman, 2015), we were interested in determining any  
284 interspecies, cell-type specific differences in these brain metabolic processes. To investigate if there were  
285 interspecies differences in expression of genes involved in aerobic glycolysis, we used a Gene Set  
286 Enrichment Analysis (GSEA) (Subramanian et al., 2005) with 23 *a priori* gene sets on the raw counts of  
287 the 12,407 genes used for interspecies pairwise CT-DE analyses. Gene sets were obtained from the  
288 Molecular Signatures Database (MSigDB) (Liberzon et al., 2011) and chosen in order to probe a variety  
289 of energetic metabolic pathways and substrate transporters of varying gene number size from multiple  
290 ontology categories (GO, KEGG, and REACTOME) (all probed gene sets listed in Figure 3A)

291 (Antonazzo et al., 2017; Ashburner et al., 2000; Fabregat et al., 2018; Ogata et al., 1999). The goal was to  
292 determine if pathways involved in aerobic glycolysis (e.g. oxidative phosphorylation, glucose transport,  
293 TCA cycle) differ in a species by cell type manner, and so pathways not directly involved in aerobic  
294 glycolysis (e.g. fatty acid metabolism) are included as a comparison. We also included “control”  
295 pathways not directly related to metabolism (regulation of growth, and neurotrophin signaling).

296 Our GSEA results indicate that the gene sets for lactate transmembrane transport, glucose  
297 transport, oxidative phosphorylation, and metabolism of RNA are significantly different between human  
298 and chimpanzee neural cells (FDR < 25% and nominal p-value < .05; Figure 3A, B, SI Table 5). Glucose  
299 transport was enriched in human neurons and astrocytes while lactate transmembrane transport was  
300 enriched in chimpanzee neurons and astrocytes (Figure 3A, B). The GO gene set for oxidative  
301 phosphorylation is significantly enriched in all human cell types while the KEGG oxidative  
302 phosphorylation is upregulated in chimpanzee astrocytes (Figure 3A, B). These results indicate cell-type  
303 by species differences in glucose uptake by cells, lactate shuttling, and diverging energetic cellular  
304 respiration.

305

### 306 **There are species by cell-type differences in expression of oxidative phosphorylation protein** 307 **complexes**

308 Leading edge analyses of significant GSEA gene sets are used to determine which genes of the  
309 gene set contribute most strongly to the enrichment of that pathway in the phenotype (Subramanian et al.,  
310 2005). We examined the results from the leading edge GSEA analysis with the CT-DE expression  
311 analyses to get a better idea of how these three pathways diverge in a cell type by species manner (Figures  
312 4 and 5; full results in SI Table 6). We calculated a rank for DE genes for each CT-DE comparison (NPC,  
313 neuron, and astrocyte): (sign of logFC) x log<sub>10</sub>(FDR Q-value) (Reimand et al., 2019) and used that in  
314 addition to the GSEA leading edge analysis to determine significant differences. For the oxidative  
315 phosphorylation genes, we were interested in determining why there was a difference in species and cell  
316 type enrichment based on the source of the gene set (KEGG vs GO) and determining if there were

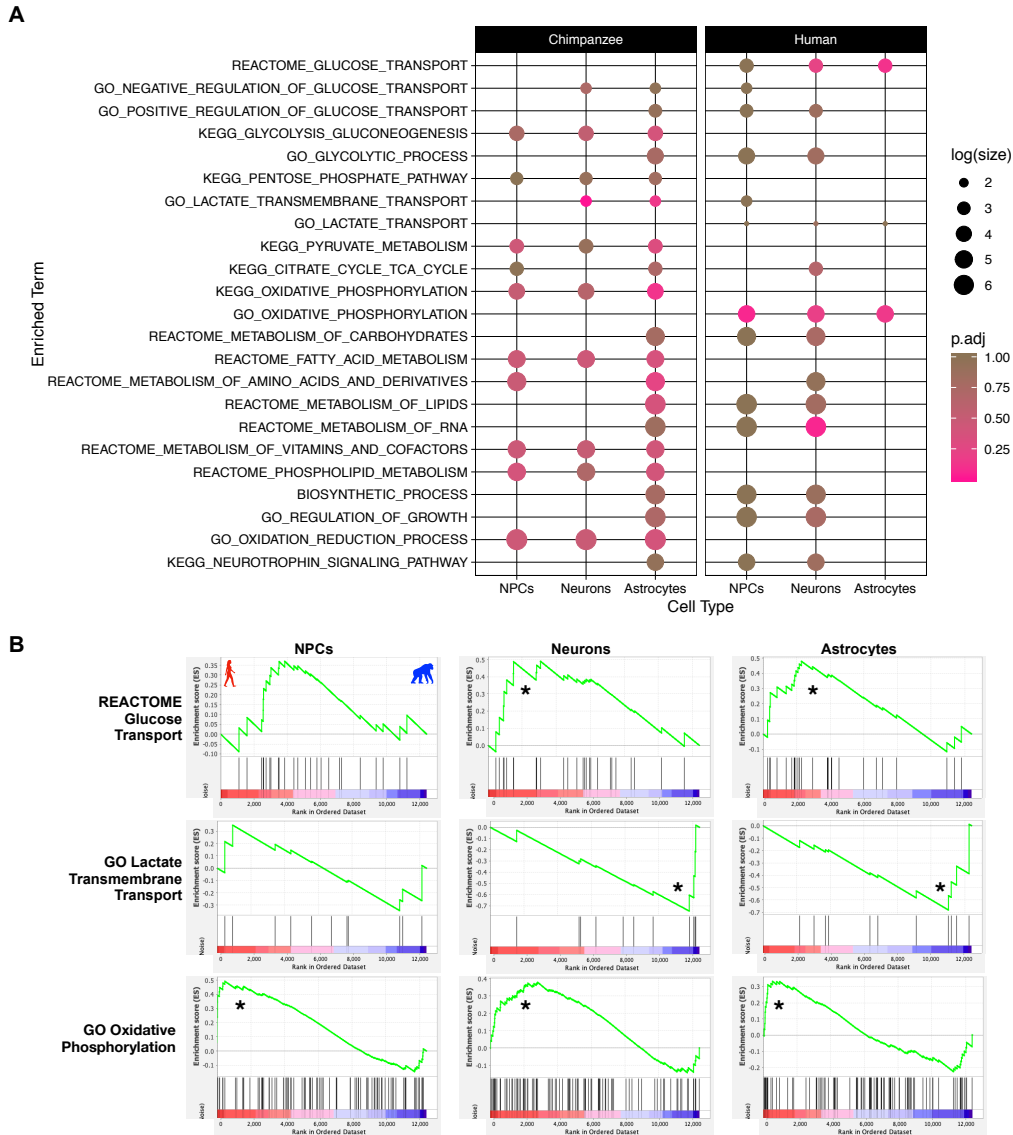

317  
 318 **Figure 3 | Humans and chimpanzees differ in metabolite transport and oxidative phosphorylation in a**  
 319 **neural cell-type manner.** A) Plot of all tested gene sets in the Gene Set Enrichment Analysis (GSEA) (full  
 320 results in SI Table 5). Separate panels indicate which species ‘phenotype’ the gene set was enriched in.  
 321 Color indicates the FDR Q-value (FDR < 25% indicates significance in this analysis). Size indicates the  
 322 log(count) of genes included in the enriched gene set. B) Enrichment plots of significant pathways from  
 323 GSEA for a subset of panel A. The green line indicates the running enrichment score for each gene in the  
 324 gene set as the analysis moves down the ranked list of genes. The enrichment score for the gene set is the  
 325 peak of this curve and an (\*) indicates significantly enriched. The bottom panel is the ranked order of the  
 326 genes and shows their location within that ranked set of genes. Left side of plot (and red/left portion of  
 327 ranked order plot below) indicates human enrichment, while the opposite (right/blue) indicates  
 328 chimpanzee enrichment. Full results in SI Table 5.  
 329

330 potential functional differences in oxidative phosphorylation between species. We mapped the CT-DE  
331 rank of the core enriched genes for GO (Figure 4A) and KEGG (Figure 4B) oxidative phosphorylation  
332 genes.

333 The core set of genes in GO and KEGG oxidative phosphorylation (OXPHOS) gene sets included  
334 genes for subunits of cytochrome c oxidase (the nuclear-encoded *COX4II*, *COX6B2*, *COX7B*, and  
335 *COX7C* and the mitochondrially-encoded *MT-CO1*, *MT-CO2*, and *MT-CO3*) as well as those that aid in  
336 cytochrome c oxidase assembly (*COX10* and *COX11*) (Figure 4A, B; SI Table 6). Cytochrome C oxidase  
337 is the terminal complex in the electron transport chain and is crucial to maintaining a proton gradient  
338 across the inner mitochondrial membrane for ATPase to synthesize ATP. These genes are of particular  
339 interest, because within anthropoids, genes encoding the subunits of cytochrome c oxidase show an  
340 accelerated rate of evolution in their sequences compared with any other placental mammals (Preuss,  
341 2012). Here, we see a cell type by species divergence in cytochrome c oxidase gene expression, where  
342 most of these genes exhibit higher expression in human neurons (Figure 4A). There is also a clear trend of  
343 mitochondrially-encoded genes that function in OXPHOS having significantly higher expression in  
344 human cells, including those for cytochrome c oxidase subunits (*MT-CO1*, *MT-CO2*, *MT-CO3*), but also  
345 mitochondrially-encoded ATP synthase (*MT-ATP6*) and mitochondrially-encoded subunits of the  
346 NADH:ubiquinone oxidoreductase core of electron transport chain complex I (*MT-ND2*, *MT-ND3*, *MT-*  
347 *ND5*, and *MT-ND6*) (Figure 4A).

348 A major difference between the GO and KEGG OXPHOS gene sets is that the KEGG OXPHOS  
349 set includes vacuolar-ATPase (V-ATPase) genes, whose major role is in acidification of intracellular  
350 organelles, and have an important function in synaptic vesicle proton gradient formation and maintenance  
351 (Maxson & Grinstein, 2014; Pamarthy, Kulshrestha, Katara, & Beaman, 2018). There is an intriguing  
352 pattern of enrichment for higher expression of subunits of V-ATPases in a cell type by species manner  
353 (Figure 4). Three genes for subunits of vacuolar ATPases (*ATP6V0C*, *ATP6V0D1*, and *ATP6V1C2*) are  
354 core enriched genes in the KEGG OXPHOS gene set and are significantly enriched in CT-DE with higher  
355 expression in chimpanzee NPCs and astrocytes, but not neurons (Figure 4B). Furthermore, only one of



356 these vacuolar-ATPase genes is DE in a SPxCT manner (*ATP6VIC2*) (Figure 4B). However, several  
357 other V-ATPase subunit genes are core enriched only in human neurons (Figure 4B), most notably  
358 *ATPVIE2* and *ATPV0E2*, both of which are core enriched and significantly differentially expressed in  
359 human neurons. This shows that V-ATPases exhibit significant DE between humans and chimpanzees,  
360 and that human neurons are distinct in V-ATPase gene expression from chimpanzee NPCs and astrocytes.  
361 Given the important function of V-ATPases in synaptic vesicle formation for neurotransmitter signaling,  
362 this may imply an important functional change in humans specifically in neurons.

363

### 364 **Interspecies differential expression of important metabolite transporter genes in neurons and** 365 **astrocytes**

366 It is widely accepted that neurons exhibit limited glycolytic capacity and that astrocytes respond to signals  
367 associated with increased synaptic signaling by increasing glucose uptake and subsequent aerobic  
368 glycolysis of glucose to produce lactate to be used as energy source by neurons (reviewed in Magistretti  
369 & Allaman, 2015; Pellerin & Magistretti, 1994). For this reason, we were interested in investigating if  
370 there were interspecies gene expression differences in lactate transport, particularly in neurons and  
371 astrocytes. We performed GSEA using glucose and lactate transport pathways. The GO gene set ‘lactate  
372 transmembrane transport’ was enriched in chimpanzee neurons and astrocytes, showing that genes  
373 involved in lactate transport are more highly expressed in these mature cell types than NPCs (SI Figure  
374 11A). Several genes in this gene set are for proton-linked monocarboxylate transporters that transport  
375 pyruvate and lactate (*SLC16A11*, *SLC16A12*, *SLC16A13*, and *SLC16A6*) that are all core enriched in  
376 neurons and astrocytes (SI Figure 11A). *SLC6A11* and *SLC16A13* are also differentially expressed in  
377 SPxCT ANOVA-like DE as well as an CT-DE manner, though *SLC16A13* is not in astrocytes (SI Figure  
378 11A). The enrichment for the lactate transmembrane transport gene set in chimpanzee neurons and  
379 astrocytes and the corresponding DE of specific pyruvate and transporter genes between species’ may  
380 suggest that chimpanzee neurons and astrocytes have the capacity to shuttle pyruvate and lactate at a  
381 higher rate than human neurons and astrocytes.

382

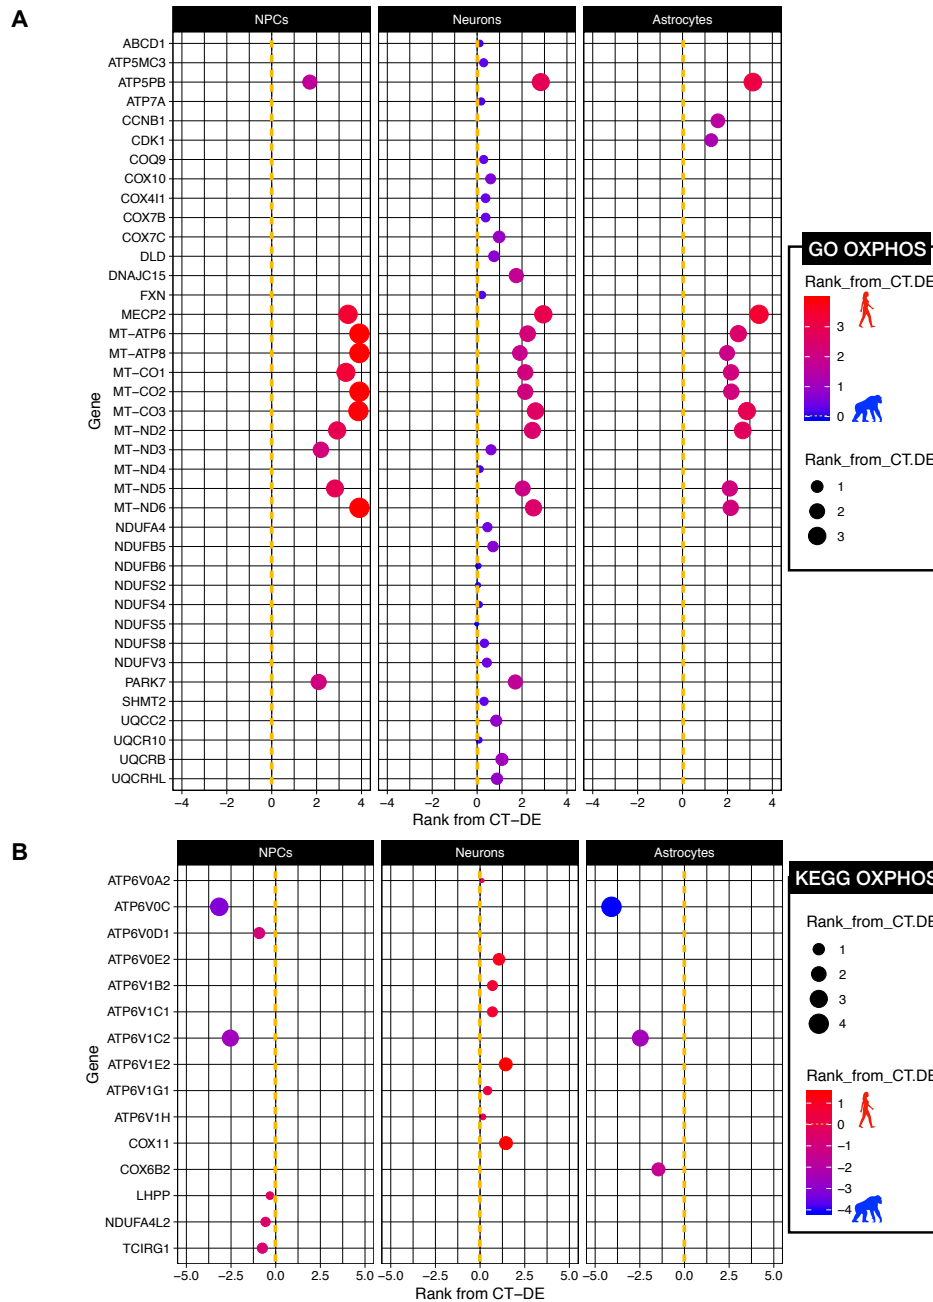

383  
 384 **Figure 4 | Interspecies expression differences of oxidative phosphorylation genes is influenced by higher**  
 385 **expression of mitochondrial genes in all neural human cell types.** CT-DE results of genes per A) GO or  
 386 B) KEGG oxidative phosphorylation gene sets determined as members of the core set of genes  
 387 influencing significant enrichment of these gene sets in the GSEA analysis. CT-DE rank was calculated  
 388 per each gene  $[(\text{sign of } \log_{2}FC) \times \log_{10}(\text{FDR } Q\text{-value})]$ , with values greater than zero indicating higher  
 389 expression in human and values less than zero indicate higher expression in chimpanzee. Color spectrum  
 390 and size also indicate rank (red – higher in human, blue – higher in chimpanzee, larger = higher rank).  
 391 See SI Table 3 for DE results per gene and SI Table 6 for GSEA results per gene.  
 392

393 In addition to lactate transmembrane transport enrichments, the glucose transport gene set was  
394 significantly enriched in human neurons and astrocytes (Figure 3). There were two hexokinase genes  
395 (*HK1* and *HK2*) core enriched in this gene set that demonstrate lower expression in chimpanzee NPCs but  
396 higher expression in human astrocytes (SI Figure 11B), though only *HK2* is significantly upregulated in  
397 human astrocytes by CT-DE analysis (SI Figure 11B). *G6PC3* may not be significantly differentially  
398 expressed in any particular cell type, but it is in the SPxCT DE comparison and does show insignificant  
399 but consistently higher expression in all chimpanzee cell types (SI Figure 11B). *SLC2A3* is a facilitative  
400 glucose transporter across the cell membrane, and here, it exhibits core enrichment in all three human cell  
401 types by the GSEA leading edge analysis, as well as moderately (though non-significant) higher  
402 expression in human (SI Figure 11B). The enrichments of glucose transport in human neurons and  
403 astrocytes appears to be influenced by increased expression of plasma membrane associated glucose  
404 transporters (e.g. *SLC2A3*) and enzymes that function in the earlier steps of glycolysis (*HK1*, *HK2*,  
405 *G6PC3*).

406

407 **A subset of genes exhibiting significantly higher expression in human astrocytes also have signs of**  
408 **positive selection in their promoter regions**

409 In order to begin to probe whether expression differences between species are influenced by  
410 selective pressures, we obtained synonymous (dS) and nonsynonymous (dN) nucleotide mutation rates  
411 from Ensembl (Kersey et al., 2017; Schneider et al., 2017) and compared the rate of change (dN/dS) for  
412 different groups of iPSC-derived neural cell expressed genes. A dN/dS > 1 indicates putative evidence of  
413 positive selection in coding regions (Herrero et al., 2016). As predicted, the vast majority of all the genes  
414 identified as expressed in these cells did not exhibit a dN/dS > 1 (SI Figure 12). Only few genes DE  
415 between species in iPSC-derived astrocytes (n=6), neurons (n=6), and NPCs (n=11) exhibit signs of  
416 coding selection (dN/dS > 1) (SI Table 7, SI Figure 12). The gene *HRC* (histidine rich calcium binding  
417 protein) exhibits positive selection and is significantly DE between species in NPCs, but not astrocytes,  
418 and is not expressed at all in neurons (SI Table 7). Three genes (*DCTN6*, *HHLA3*, *DBNDD2*) have a

419 dN/dS > 1 and showed significantly DE in all three cell types (SI Table 7). However, there is no  
420 commonality in these genes to suggest any meaningful impact on gene expression differences or in  
421 specific cell types. This is likely due, in part, to the limitations of the methods used for probing coding  
422 sequences, rather than those in non-coding, *cis*-regulatory changes, which previous studies have  
423 demonstrated are critical for significant differences in expression in primate brains (Babbitt et al., 2010;  
424 Bauernfeind et al., 2015; Haygood et al., 2007).

425 To further probe for signs of selective pressure in non-coding regions, we tested the promoter  
426 regions of aerobic glycolysis genes that were expressed in our samples. Thirteen of 156 aerobic glycolysis  
427 genes exhibited signs of positive selection (SI Table 8). These included two V-ATPase component  
428 proteins (*ATP6V1G1* and *ATP6V1H*), four nucleoporins (*NUP85*, *NUP54*, *NUP214*, and *NUP107*), a  
429 subunit of the NADH dehydrogenase complex of the ETC (*NDUFA4*), cyclin B1 (*CCNB1*), an RNA  
430 binding protein (*RAE1*), and two glycolysis genes, glucokinase regulator (*GCKR*) and hexokinase (*HK1*).  
431 Interestingly, though all of these genes were expressed to some degree in all three cell types and in both  
432 species (with the exception of *GCKR*), they were only ever significantly differentially expressed between  
433 species in astrocytes (n=4 DE in astrocytes; SI Table 8). Of these four genes that were significantly DE  
434 between species and under positive selection include *CCNB1*, *NDUFA4*, and *NUP85* were more highly  
435 expressed in human astrocytes, while *SLC16A11* was more highly expression in chimpanzee astrocytes.  
436 Of note, *GCKR* is only expressed in astrocytes, with significantly higher expression in chimpanzee (SI  
437 Table 8). Significant results from this test suggest regulatory elements that control expression of these  
438 genes may be under selection in humans. Significant results from this analysis support selection in genes  
439 involved in metabolic processes in humans.

440

#### 441 **Differences in the aerobic glycolysis genes are primarily in NPCs and astrocytes but not neurons**

442 In order to obtain a more comprehensive, pathway-level understanding of altered expression of  
443 aerobic glycolysis in iPSC-derived neural cells between humans and chimpanzees, we reconstructed a  
444 signaling network diagram of enzymes involved in four sub-pathways involved in aerobic glycolysis

445 (glycolysis, pentose phosphate pathway, pyruvate conversion to lactate, and the citric acid (TCA) cycle)  
446 from the HumanCyC database (P. Romero et al., 2005) (Figure 5). We then mapped discrete expression  
447 values (higher in human, higher in chimpanzee, not expressed) for each of these enzymes in all three cell  
448 types onto the pathway diagram to illustrate which species the enzymes were more highly expressed in  
449 and if they were significantly differentially expressed between species. From this, we see dynamic  
450 changes in expression across aerobic glycolysis sub-pathways, with no significant shift towards higher  
451 expression of enzymes in one species or cell type at any of these sub-pathways (Figure 5). Aerobic  
452 glycolysis enzymes exhibiting interspecies DE in NPCs were *PGD*, *LDHA*, *LDHB*, *LDHC*, and *ME1*,  
453 enzymes demonstrating DE in astrocytes were *PGD*, *HK2*, *PDHA1*, *FH*, *ACO2*, and *SDHD*, and only a  
454 single enzyme exhibited interspecies DE in neurons (*LDHB*) (Figure 5). This shows that NPCs and  
455 astrocytes, but not neurons, exhibit the vast majority of significant differences in expression of enzymes  
456 in these pathways (Figure 5). The majority of these genes were expressed in all cell types, particularly  
457 those that exhibited significant DE in NPCs or astrocytes, so this lack of DE in neurons is not simply due  
458 to cell-type specific expression differences (SI Figure 13). Human and chimpanzee astrocytes appear to  
459 diverge at the stage of pyruvate utilization, where human astrocytes exhibit significantly higher  
460 expression of *PDHA1*, which converts pyruvate into acetyl-coA whereas chimpanzee astrocytes show  
461 significantly higher expression of *LDHB*, which converts pyruvate into lactate rather than acetyl-coA  
462 (Figure 5). Interestingly, *LDHB* is also the only enzyme in these pathways exhibiting differential  
463 expression between species in neurons. Other *LDH* isoforms (*LDHC* and *LDHA*) also exhibit significant  
464 interspecies DE, with higher expression in chimpanzee NPCs. All chimpanzee neural cell types differ  
465 from human chimpanzees for *LDH* expression, but chimpanzee NPCs differ from human NPCs in  
466 expression levels of multiple *LDH* isoforms. This pathway level consideration of expression differences  
467 between species suggests significant changes in aerobic glycolysis enzyme activity primarily in NPCs and  
468 astrocytes and an interspecies divergence in pyruvate utilization.

469  
470

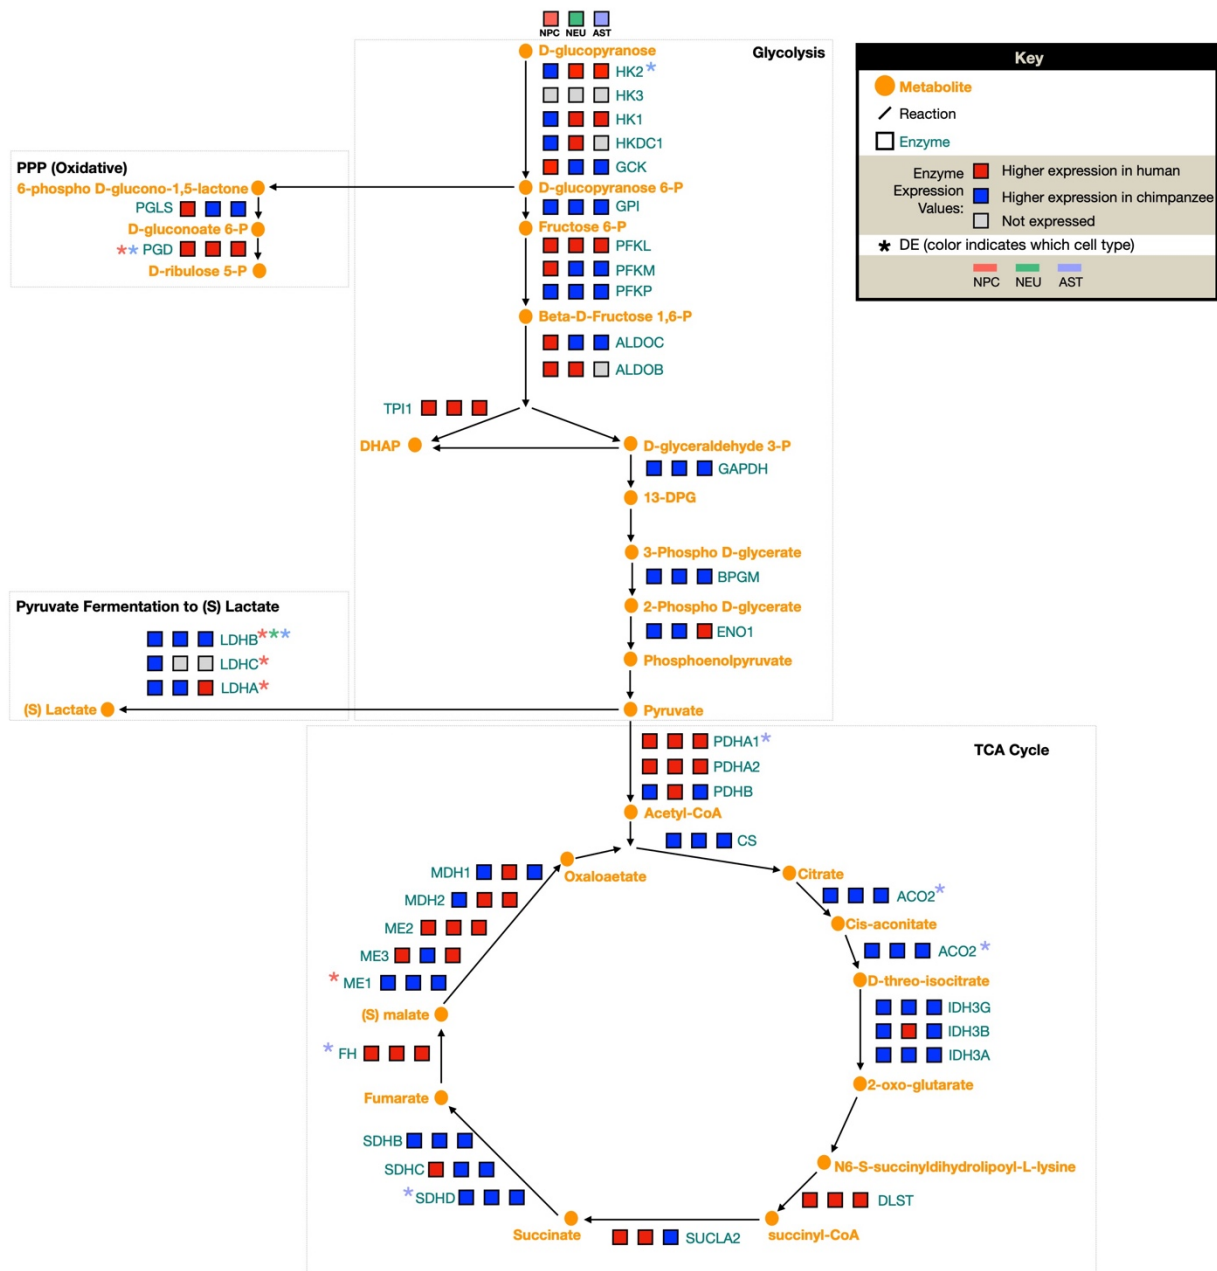

471  
 472 **Figure 5 | Divergence in pyruvate utilization between species' astrocytes.** We constructed a focal set of  
 473 aerobic glycolysis signaling pathways in order to contextualize our DE results in the framework of a  
 474 network signaling. A diagram of the major pathways involved in aerobic glycolysis (glycolysis, pentose  
 475 phosphate pathway (PPP), lactate conversion from pyruvate, and TCA cycle). For each enzyme in the  
 476 pathway, three blocks indicate expression of this enzyme in each cell type – left to right: NPCs, neurons,  
 477 astrocytes. Color indicates level of expression (higher in human (red), higher in chimpanzee (blue), not  
 478 expressed in this cell type (grey)).  
 479

## 480 **DISCUSSION**

481  
482  
483 Our novel approach using iPSCs allowed us to investigate rare neural cell types from primates to  
484 determine cell type specific metabolic changes necessary to support evolution of the human brain. Our  
485 results demonstrate that interspecies divergence in gene expression is more conserved in neurons and  
486 significantly greater between species' astrocytes. Differential expression between species' cell types is  
487 enriched for metabolic processes related to cellular respiration. This finding is similar to that of previous  
488 studies of differential expression between human and chimpanzee whole brain tissue (Haygood et al.,  
489 2007; Kosiol et al., 2008; Uddin et al., 2008), and our results suggest this is driven primarily by higher  
490 expression of metabolic genes in human cells. However, there were some interesting examples of  
491 potential tradeoffs in expression patterns of specific genes and pathways in a cell-type by species manner.  
492 We determined that human neurons and astrocytes are enriched for higher expression of glucose transport  
493 proteins while chimpanzee neurons and astrocytes exhibit higher expression of lactate transmembrane  
494 transport genes and that there are dynamic interspecies changes in expression of nuclear- and  
495 mitochondrially-encoded subunits of the protein complexes important for oxidative phosphorylation. Our  
496 study demonstrates the utility of iPSC-derived cells for better understanding evolution of gene expression  
497 in primate brains.

498 Previous work has determined several significant differences in expression of cellular respiration  
499 pathways and evidence of differential selective pressure associated with metabolic genes (both noncoding  
500 and coding) between human and chimpanzee brains (Goldberg et al., 2003; Grossman et al., 2001;  
501 Grossman et al., 2004; Hüttemann et al., 2012; Uddin et al., 2008; Wildman et al., 2002; Wu et al., 1997).  
502 However, the heterogenous nature of brain tissue has complicated drawing conclusions about the  
503 contribution of specific cell types to this trajectory of elevated metabolic expression in human brains.  
504 Specifically, there is a long-standing question about the sole influence of greater neuron numbers in  
505 human brains (Herculano-Houzel, 2011) on the observed increase in glucose utilization (Hofman, 1983;  
506 Mink et al., 1981). Our approach allowed us to further investigate the cell-type specific contributions to

507 long-understood differences in brain metabolic capacity. Because our methods of determining significant  
508 differences in gene expression do not rely on number of cells or absolute quantity of transcripts, we are  
509 able to conclude that there are cell-type specific contributions to altered metabolic gene expression  
510 between species' neural cell types, and that sheer number of cells alone likely does not fully explain  
511 metabolic differences between human and chimpanzee brains. We found that astrocytes display the  
512 greatest proportion of interspecies difference in metabolic gene expression and that neuronal gene  
513 expression actually appears to be more conserved across species. Our results demonstrate that, in light of  
514 the relatively recent discovery of cell-type specific metabolic differences between neurons and astrocytes,  
515 investigation of differences in brain metabolism among primates and the evolutionary processes that  
516 shaped them would indeed be incomplete without the consideration of all neural cell types, not just  
517 neurons. This suggests that astrocyte-mediated differences in metabolic brain function may be an  
518 important mechanism by which the ultimate evolutionary trajectory of human brain evolution has  
519 occurred.

520 Human cells show increased capacity for glucose transport, via greater expression of glucose  
521 transporters, in the mature neural cell types investigated here. This may imply that the observed  
522 differences in glucose utilization of the human brain extend beyond development and may play an  
523 important role in more mature neurons and astrocytes for either energy or macromolecule production.  
524 Furthermore, lactose dehydrogenase (*LDH*) isoforms favor differential affinities for interconverting  
525 pyruvate and lactate. *LDHB* favors the production of lactate into pyruvate (Almad et al., 2016;  
526 Bauernfeind & Babbitt, 2014), and is significantly differentially expressed with higher expression in  
527 chimpanzee for all cell types. This coupled with higher expression of lactate transporters in chimpanzee  
528 astrocytes suggests that chimpanzee cells may be favoring production and transport of lactate at a higher  
529 rate than all human neural cell types tested. This opposing enrichment for elevated glucose transport in  
530 mature human neural cell types in comparison to elevated lactate transport and conversion to pyruvate in  
531 mature chimpanzee cells raises some intriguing questions about metabolic trade-offs between human and  
532 chimpanzee brains. If we presume that the direction of change in metabolic gene expression is on the



533 human lineage, and we do have some evidence from signs of positive selection on glucose and energetic  
534 metabolism coding and non-coding genes within primates with proximity to humans (Goldberg et al.,  
535 2003; Grossman et al., 2001; Grossman et al., 2004; Hüttemann et al., 2012; Uddin et al., 2008), then  
536 perhaps an increase in glucose uptake in human brains has allowed for a decrease in expression of genes  
537 that convert and shuttle lactate (via LDH and lactate transporters) to produce pyruvate. Previous studies  
538 have found lineage-dependent differences in enrichments for metabolic pathways in genes DE between  
539 primate brain regions, with greater glucose and carbohydrate metabolism in humans but higher glycogen  
540 and acyl-CoA metabolism in chimpanzees (Haygood et al., 2007; Kosiol et al., 2008; Uddin et al., 2008).  
541 The increase in LDH and lactate transport in chimpanzee neurons and astrocytes may be an important  
542 cell-type specific mechanism contributing to findings of significant metabolic differences in previous  
543 studies of whole brain tissue.

544 Human neural cells were enriched at the pathway level for oxidative phosphorylation genes, and  
545 within that pathway, there were some interesting examples of opposing enrichment for subunits of  
546 oxidative phosphorylation protein complexes. We observed increased expression and enrichment for  
547 components of cytochrome c oxidase, which previous studies have determined genes involved in this  
548 complex to be under positive selection (Goldberg et al., 2003). However, we expand on the knowledge of  
549 interspecies differences in cellular respiration complex expression by determining that these components  
550 are more highly expressed in all human cell types investigated, and particularly in human neurons (Figure  
551 4A). We also observed higher expression for subunits of other electron transport chain complexes,  
552 including ATP-synthase and the NADH:ubiquinone oxidoreductase components of complex I. This cell-  
553 type by species approach also allowed for us to determine that human neurons and chimpanzee NPCs and  
554 astrocytes have higher expression for genes involved in vacuolar-ATPase function. We also determined  
555 that two V-ATPase genes exhibit signs of positive selection in their coding regions, though neither were  
556 differentially expressed between species. Our findings that V-ATPases are significantly differentially  
557 expressed between humans and chimpanzees suggests that human neurons are distinct in V-ATPase gene  
558 expression from chimpanzee NPCs and astrocytes. Given the important function of V-ATPases in

559 synaptic vesicle formation for neurotransmitter signaling, this may be an mechanism by which human-  
560 specific changes in neuronal signaling has occurred.

561 Our investigation into the overlap of signatures of positive selection in coding regions of genes  
562 exhibiting interspecies DE revealed very little new or intriguing information. This is likely due at least in  
563 part to the limited scope of the current methods for searching for positive selection. The dN and dS scores  
564 obtained from Ensembl for use in this analysis were averages across all sites in a given gene, thus  
565 minimizing significant changes at specific sites (Yang, 2007). Our investigation of non-coding regulatory  
566 regions of genes in oxidative phosphorylation and glycolysis pathways found several genes to be under  
567 positive selection to varying degrees in humans, with some overlap with previous reports (Haygood et al.,  
568 2010) though there were some noticeable differences. For example, glucose-6-phosphate isomerase  
569 (*GPI*), which has been determined to be under positive selection in its non-coding promoter region in  
570 previous studies (Haygood et al., 2007), did not exhibit interspecies DE in any of these cell types.

571 However, we did find evidence of positive selection in promoters of several aerobic glycolysis genes in  
572 the human lineage. Interestingly, we see that aerobic glycolysis genes exhibiting positive selection in  
573 promoter sequences were only significantly differentially expressed between species in astrocytes, not  
574 NPCs or neurons. Hexokinase and glucokinase both function in the conversion of glucose to glucose-6-  
575 phosphate, thus playing an early role in glycolysis. We found that there are significant expression  
576 differences in these key genes between species' astrocytes. Human astrocytes significantly upregulate  
577 *HK1* while chimpanzee astrocytes significantly upregulate glucokinase regulator (*GCKR*), which also  
578 exhibits positive selection in its promoter. This suggests that there is an evolved difference in the initial  
579 processing of glucose during glycolysis in an astrocyte-mediated manner, in addition to interspecies  
580 differences in the expression of glucose transporters. We also found evidence of adaptive divergent  
581 astrocyte glycolytic activity between species' for utilizing pyruvate. In addition to the difference in  
582 pyruvate conversion enzymes and lactate transmembrane shuttling, we found evidence of positive  
583 selection on the human lineage and a significant increase in expression in chimpanzee astrocytes of  
584 *SLC16A11*, which functions in catalyzing transport of pyruvate across the plasma membrane. These

585 results are intriguing in that they demonstrate that evidence of positive selection in the human lineage and  
586 divergent gene expression in genes involved in pyruvate processing and transport. These positive  
587 selection analyses further corroborate that there are significant differences in glycolytic gene expression  
588 between species' astrocytes at initial steps in glycolysis as well as pyruvate utilization. Combined, this  
589 supports the evolution of metabolism in the human brain. Future investigations of the overlap between  
590 genes exhibiting DE in a cell-type specific manner and signatures of positive selection should utilize  
591 methods that allow for branch and site models that are more effective at determining positive selection in  
592 a lineage-specific manner (e.g HyPhy for non-coding and coding regions) (Haygood et al., 2007; Horvath  
593 et al., 2014; Muntané et al., 2014; Pond, Frost, & Muse, 2004).

594 Our focal analysis of aerobic glycolysis enzyme expression yielded several important findings. We  
595 show that there is not a consistent single species skew in expression levels for any of the sub-pathways in  
596 aerobic glycolysis (e.g. all glycolysis enzymes exhibited higher expression in one species or another, with  
597 no change in genes involved in TCA or lactate shuttling). The lack of significant DE between species in  
598 neurons for aerobic glycolysis enzymes demonstrates the importance of studying cell types other than  
599 neurons when investigating human brain evolution, and suggests that astrocytes may indeed be critical for  
600 the evolution of the metabolically demanding human brain. We also found that it is not simply the lack of  
601 glycolytic capacity of neurons (Almeida et al., 2004; Herrero-Mendez et al., 2009; Sonntag et al., 2017)  
602 that contributes to cell-type specific signaling disparities, at least in a comparative manner, because the  
603 majority of interspecies differentially expressed genes were expressed to some degree in all cell types.  
604 Perhaps the most intriguing finding is the interspecies divergence in processing pyruvate. Humans exhibit  
605 significantly higher expression of *PDHAI* than chimpanzees do, indicative of a functionally relevant  
606 increase in conversion of pyruvate into acetyl-CoA and further utilization of the products of glycolysis for  
607 energy production, while chimpanzee astrocytes exhibit expression phenotypes suggestive of greater  
608 lactate production (higher expression of *LDH*, which converts pyruvate to lactate) as well as enrichment  
609 for greater lactate transmembrane transport in chimpanzee neural cell types (higher expression of lactate  
610 transmembrane transporters). This suggests that chimpanzee neural cells, and most prominently

611 astrocytes, have a significantly greater capacity to convert pyruvate into lactate and then shuttle it across  
612 membranes than human astrocytes do. These analyses suggest significant interspecies changes in aerobic  
613 glycolysis enzyme activity primarily in NPCs and astrocytes and an interspecies divergence in pyruvate  
614 utilization. Previous work has shown a shift from aerobic glycolysis in NPCs to oxidative  
615 phosphorylation in more mature neurons (Zheng et al., 2016), but this study is the first of our knowledge  
616 to compare across species and include astrocytes. More generally, we see that astrocytes exhibit the  
617 greatest degree of expression difference between species than the other cell types while neuronal gene  
618 expression is more conserved. A recent investigation of multiple brain regions from human, chimpanzee,  
619 bonobo, and macaque using single-cell RNA-seq also found that astrocytes were one of the cell types  
620 exhibiting the greatest expression differences in humans (Khrameeva et al., 2020). This increased  
621 variation in interspecies gene expression in astrocytes suggests that previously observed differences in  
622 whole brain gene expression may be due astrocyte-specific changes to a larger degree than previously  
623 thought, and that this is a crucial cell type to consider when investigating human-specific brain gene  
624 expression has evolved.

625 Evolved differences in metabolic investment may be the basis for a number of primate-specific  
626 phenotypes, including those that are unique to humans, (e.g. slow reproduction and long lifespan  
627 (Charnov & Berrigan, 1993; Pontzer et al., 2014; Snodgrass, Leonard, & Robertson, 2007)). Our results  
628 provide insight into the metabolic changes that were necessary to support evolution of the human brain.  
629 We have demonstrated a significant interspecies divergence in aerobic glycolytic gene expression in  
630 astrocytes, suggesting that this traditionally understudied glial cell type likely contributes to the tissue-  
631 level shifts in gene expression and that astrocytes play an important role in the evolution of the  
632 metabolically expensive human brain. A potential challenge in cell-type specific studies of interspecies  
633 differences in brain gene expression is the loss of intercellular signaling between different cell types, a  
634 hallmark of synaptic signaling in whole tissue. Furthermore, the astrocyte-neuron lactate shuttle links the  
635 complementary metabolic needs of astrocytes and neurons (reviewed in Magistretti & Allaman, 2015;  
636 Pellerin & Magistretti, 1994). Future studies of gene expression differences with controlled levels of

637 intercellular signaling by building in complexity (e.g. interspecies differences in expression of single cell  
638 types compared to that of co-cultured iPSC-derived neurons and astrocytes) could further inform  
639 interspecies differences in neuronal gene expression.

640

## 641 **MATERIALS AND METHODS**

642

643

644 SAMPLES AND CELL CULTURE: Induced pluripotent stem cells (iPSCs) from three individuals (cell

645 lines) per species (human and chimpanzee) were cultured in defined, iPSC-specific media mTeSR1

646 (STEMCELL, Vancouver, Canada). These cell lines were originally obtained as fibroblasts from

647 minimally invasive skin biopsies, reprogrammed into iPSCs, and have been extensively validated for their

648 pluripotency and differentiation abilities (Blake et al., 2018; Burrows et al., 2016; Eres et al., 2019;

649 Pavlovic et al., 2018; I. G. Romero et al., 2015; Ward & Gilad, 2019; Ward et al., 2018). Three cell lines

650 per species, representing three male individuals, were used (SI Table 1). To investigate differences

651 between human and chimpanzee neural cell types, we induced iPSCs from each species first into

652 multipotent, neural-lineage committed neural progenitor cells (NPCs) using STEMdiff Neural Induction

653 Medium in monolayer for three passages (21-28 days), as per manufacturer's instructions (STEMCELL

654 Technologies, Vancouver, Canada). Successful transition of iPSCs into NPCs was determined using

655 immunofluorescence for the absence of the stem-cell marker OCT4 and presence of the NPC-marker

656 PAX6 (Figure 1A). NPCs were then expanded into three subsets: one for RNA collection, and two for

657 further differentiation and maturation into neurons and astrocytes. We then differentiated NPCs into

658 mature neurons and astrocytes using the neuron and astrocyte specific STEMdiff differentiation and

659 maturation kits as recommend by the manufacturer. Briefly, we differentiated NPCs using the STEMdiff

660 Neuron Differentiation Medium for one week and then matured them using the STEMdiff Neuron

661 Maturation Medium for two weeks. Similarly, we differentiated NPCs using the STEMdiff Astrocyte

662 Differentiation Medium for three weeks and then matured them using the STEMdiff Astrocyte Maturation

663 Medium for two weeks. All cells were validated for cell type via immunofluorescence prior to harvesting

664 as follows: NPCs for PAX6+/OCT4- (Developmental Studies Hybridoma Bank, Iowa City, IA), neurons  
665 for neuron-specific class III  $\beta$ -tubulin (TUJ1; Neuromics, Edina, MN), and astrocytes for GFAP (Sigma  
666 Aldrich, St. Louis, MO), according to manufacturer's suggestions (SI Figure 1). All mature iPSC-derived  
667 cells for each cell type were harvested at similar timepoints: NPCs at passage 5-6 post-induction from  
668 iPSCs, mature neurons at passage 3-4 and mature astrocytes at passage 5-6 post-differentiation from  
669 NPCs and subsequent maturation (SI Table 1). We used edgeR (Robinson et al., 2010) to normalize our  
670 raw counts across all samples and visualized these data using a multidimensional scaling (MDS) plot of  
671 all of the expressed genes (Figure 1B).

672 LIBRARY PREPARATION AND SEQUENCING: Total RNA was extracted from cells (1-2 wells, 6  
673 well plate) using an RNeasy Plus Mini Kit (Qiagen, Hilden, Germany), including a DNase step to remove  
674 residual DNA. Total RNA was analyzed for quality using the Bioanalyzer RNA 6000 Nano kit (Agilent,  
675 Santa Clara, CA) with RNA Integrity Numbers (RINs) for all samples between 8.3-10 (SI Table 1) .  
676 Using the NEBNext Poly(A) Magnetic mRNA Isolation Kit (NEB), mRNA was isolated from intact total  
677 RNA, and cDNA libraries were made from each sample using the NEBNext RNA Ultra II Library Prep  
678 Kit for Illumina (New England Biolabs, Ipswich, MA). Barcoded samples were sequenced using the  
679 Illumina NextSeq 500 (Illumina, San Diego, CA) platform at the Genomics Resource Core Facility  
680 (Institute for Applied Life Sciences, UMass Amherst) to produce 75 base pair single-end reads, yielding a  
681 minimum of 32 million reads per sample.

682 READ MAPPING AND QUANTIFICATION: Quality-filtered reads were aligned to respective species'  
683 most recent ENSEMBL genome (*Homo sapiens* GRCh38 and *Pan troglodytes* PanTro3.0 (Kersey et al.,  
684 2017; Schneider et al., 2017)) with Bowtie2 (Langmead & Salzberg, 2012) using default '--local'  
685 parameters for gapped alignments, with a minimum alignment percentage of  $\geq 98.84\%$  (SI Table 1). HT-  
686 Seq (Anders, Pyl, & Huber, 2015) was used to quantify counts per gene for each sample, using  
687 ENSEMBL gene transfer files (GTFs) corresponding to the same genome build used for alignment (Aken  
688 et al., 2016). High quality, one-to-one orthologs from *P. troglodytes* were matched to the ENSEMBL  
689 human reference set of genes using biomaRt (Kinsella et al., 2011), yielding 15,284 genes identified as

690 expressed in at least one sample. All data are available in FASTQ format in the National Center for  
691 Biotechnology Information's (NCBI) Short Read Archive (SRA) with accession number PRJNA665853  
692 (publicly available upon publication). A link for reviewers' pre-publication can be found here:  
693 <https://dataview.ncbi.nlm.nih.gov/object/PRJNA665853?reviewer=hobvb5i4ejtpt0jp6r9r29e372>.  
694 **CLUSTERING ANALYSES:** We used clustering analyses to determine the variation among our iPSC-  
695 derived samples as well as in comparison to previously published, publicly available data from other  
696 tissues and cell types. For our iPSC-derived samples, we used the R package edgeR (Robinson et al.,  
697 2010) to filter out lowly-expressed genes (counts per million (CPM) > 1 in 12/17 samples), resulting in  
698 10,715 orthologous genes, and produced an MDS plot of our samples (Figure 1B). The greatest influence  
699 on our samples is species along PC1 and PC2, followed by separation of immature NPCs cells from  
700 mature cell types (neurons and astrocytes) along PC2 (Figure 1B). Notably, human samples were more  
701 variable than chimpanzee samples. One human cell line (H20961) showed significant variation across all  
702 cell types (SI Figures 2-4), however, the H20961 NPC sample was consistently an outlier, grouping  
703 outside of NPCs of either species, and was removed from subsequent analyses. There are no overt  
704 technical differences influencing this out-grouping (e.g. individual sex or age, RNA or cDNA library  
705 quality, read number, alignment percentages, SI Table 1). This cell line has successfully been used in  
706 before in other differentiation studies with no overtly different characteristics (Blake et al., 2018; Burrows  
707 et al., 2016; Eres et al., 2019; Pavlovic et al., 2018; I. G. Romero et al., 2015; Ward & Gilad, 2019; Ward  
708 et al., 2018).

709 To compare our samples to previously published data from cells and tissues, we downloaded raw  
710 RNA-Seq reads from the NCBI's Gene Expression Omnibus (GEO) (Edgar, Domrachev, & Lash, 2002)  
711 and processed them from raw read counts through HT-Seq and orthologous gene matching in the same  
712 manner as our iPSC-derived samples. To compare our samples to those from primary neural cell types,  
713 we used RNA-Seq data from primary neurons and astrocytes obtained from four hippocampal astrocytes,  
714 four cortex astrocytes, and one cortical neuron from (Zhang et al., 2016) (GEO accession number  
715 GSE73721) and three pyramidal neuron samples (GEO accession numbers GSM2071331, GSM2071332,

716 and GSM2071418) isolated from an unspecified brain region by the ENCODE project (Consortium,  
717 2012; Davis et al., 2018). We also downloaded the tissue-level data from Brawand et al., (2011)  
718 (Brawand et al., 2011) from human and chimpanzee brain regions and non-neuronal tissue (heart, kidney,  
719 liver) (GEO accession number GSE30352) (SI Table 2 for details). Only genes with counts greater than  
720 zero in all samples were included (n=7,660) and were further filtered to include only those with CPM > 1  
721 in all 23 samples (n=6,124). An MDS plot of normalized counts was generated using edgeR of the top  
722 500 most differentially expressed genes in all samples (SI Figure 5).

723 DIFFERENTIAL GENE EXPRESSION ANALYSES: In order to determine what genes were  
724 significantly differentially expressed in a species by cell type manner using, we used the R package  
725 edgeR's (Robinson et al., 2010) generalize linear model (GLM) functionality with a design matrix  
726 accounting for an interaction between species (SP) and cell type (CT) (referred to as SPxCT DE analysis).  
727 We performed an analysis of variance (ANOVA)-like test for differences across all samples. Furthermore,  
728 in order to determine what differences existed between species for each cell type, we performed  
729 interspecies pairwise DE comparisons in a similar manner between NPCs, neurons, and astrocytes  
730 (referred to as CT-DE analyses). We also used the GLM for these analyses, but did not include more than  
731 one cell type in these analyses in order to include genes that may be cell-type specific. For all analyses,  
732 we used edgeR's quasi-likelihood F-test and considered gene expression significantly different at a false  
733 discovery rate (FDR) of less than 5%. Normalization of data in edgeR for DE analyses ensured that DE is  
734 not dependent on original number of cells. All Venn diagrams were created using the R package  
735 Vennable.

736 CATEGORICAL ENRICHMENT ANALYSES: Uninformed pathway enrichment analyses were  
737 conducted using genes identified as differentially expressed from each DE comparison using gProfiler  
738 (Raudvere et al., 2019) with their functional enrichment tool (g:GOST). Categorical enrichment analyses  
739 for overrepresented (enriched) and underrepresented (conserved) processes were conducted on all genes  
740 identified as differentially expressed (FDR < .05%) between species for individual cell types.  
741 Enrichments with a q-value of < .05 were considered significant.



742 GENE SET ENRICHMENT ANALYSES: In order to investigate which metabolic pathways were  
743 enriched in a species' CT, we used Gene Set Enrichment Analyses (GSEA) (Subramanian et al., 2005).  
744 We tested for enrichment of 23 *a priori* gene sets from the Molecular Signatures Database (MSigDB)  
745 (Liberzon et al., 2011) using the raw counts of the same set of genes used for the CT-DE pairwise  
746 comparisons. Gene sets were considered significantly enriched according to suggested thresholds (FDR <  
747 25% and nominal p-value < .05) (Subramanian et al., 2005). Leading edge analyses determined a set of  
748 core enriched genes that most significantly influenced the enrichment of the gene set per phenotype.

749 SELECTION ANALYSES: In order to determine if genes exhibiting significant interspecies differential  
750 expression also had evidence of positive selection in their coding sequences, we used nonsynonymous  
751 (dN) and synonymous (dS) nucleotide changes per gene for all genes expressed in iPSC-derived neural  
752 cells. These were obtained from Ensembl using biomaRt (Kinsella *et al.*, 2011). These pre-calculated dN  
753 and dS values were originally computed by Ensembl using codeml and yn00 of the PAML package to  
754 compute dN and dS scores for each species in comparison to human (Herrero *et al.*, 2016). A rate of  
755 change was calculated for each gene (dN/dS), where a dN/dS > 1 is indicative of positive selection  
756 (Herrero et al., 2016). In order to determine if there was evidence for noncoding selection, we analyzed  
757 promoter regions of genes involved in aerobic glycolysis. These genes were selected by downloading  
758 gene lists from the Molecular Signatures Database (MSigDB) (Liberzon et al., 2011) for GO pathways  
759 involved in aerobic glycolysis (glycolysis, pyruvate conversion to lactate or acetyl CoA, TCA cycle,  
760 electron transport chain, oxidative phosphorylation) and further subset to those that were expressed in at  
761 least one sample (n=156). Signs of positive selection in non-coding regions adjacent to these genes were  
762 determined following the procedures outlined in Pizzollo et al., 2018 (Haygood et al., 2007; Pizzollo et  
763 al., 2018). Because these analyses are suited for nuclear encoded genes, we excluded mitochondrial-  
764 encoded genes (n=10). Rhesus macaque (*Macaca mulatta*) was used as an outgroup. After removing  
765 regions without sequences for all three species (human, chimpanzee, and rhesus macaque), we tested for  
766 positive selection in the human lineage of a total of 126 aerobic glycolysis genes.

767 NETWORK SCHEMATIC: We constructed a focal set of signaling pathways based upon HumanCyc (P.  
768 Romero et al., 2005) in order to contextualize our DE results in the framework of a network signaling,  
769 and this is the diagram of the major pathways involved in aerobic glycolysis (glycolysis, pentose  
770 phosphate pathway (PPP), lactate conversion from pyruvate, and TCA cycle) shown in Figure 5. For each  
771 enzyme in the pathway, three blocks indicate expression of this enzyme in each cell type (left to right):  
772 NPCs, neurons, astrocytes. Color indicates level of expression (higher in human (red), higher in  
773 chimpanzee (blue), not expressed in this cell type (grey)).

774

#### 775 **ACKNOWLEDGEMENTS**

776 We would like to thank all members of the Babbitt laboratory for all of their support and feedback. We  
777 also thank Elena Vazey, Jason Kamilar, and Patricia Wadsworth for their insights and feedback.

778

#### 779 **COMPETING INTERESTS**

780 The authors declare no competing interests.

781 SUPPLEMENTAL FIGURES & TABLES  
782

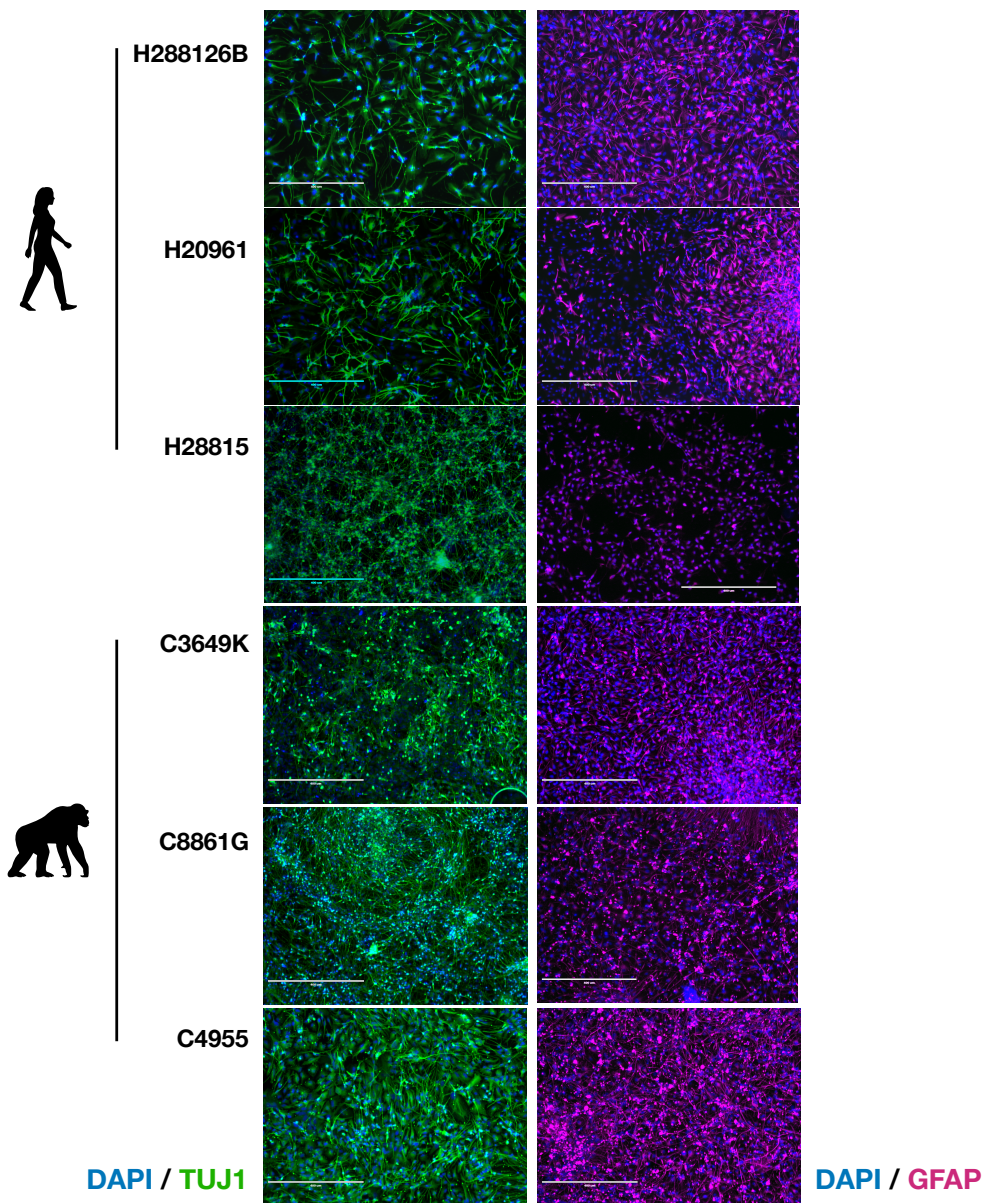

783  
784  
785  
786  
787  
788  
789  
790  
791  
792  
793

**SI Figure 1 | Differentiation and maturation of a human and chimpanzee iPSC lines into neural cell types.** Immunofluorescent validation of matched-by-cell-line iPSC-derived neurons and astrocytes. Left column is images of cells immunofluorescently labeled for neuron-specific class III  $\beta$ -tubulin (TUJ1; Neuromics), and the right column is images of iPSC-derived astrocytes immunofluorescently labeled for GFAP (Sigma Aldrich), according to manufacturer's suggestions. All cells for each cell type were harvested at similar timepoints: neurons at passage 3-4 and mature astrocytes at passage 5-6 post-differentiation from NPCs (SI Table 1).

794  
795

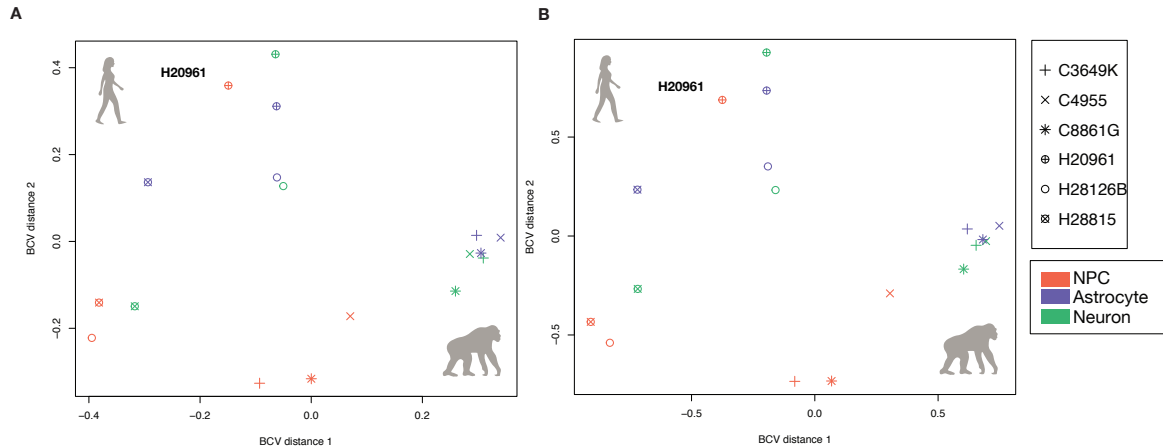

796  
797

**SI Figure 2 | MDS plots of all iPSC-derived samples with shape indicating cell line.** The same MDS plots for A) all genes expressed and B) the top 500 more differentially expressed genes as in main Figure 1C where shape indicates individual cell lines.

801  
802  
803  
804  
805  
806  
807  
808  
809  
810  
811  
812  
813  
814  
815  
816  
817  
818  
819  
820  
821  
822  
823  
824  
825  
826  
827  
828  
829  
830

831  
832

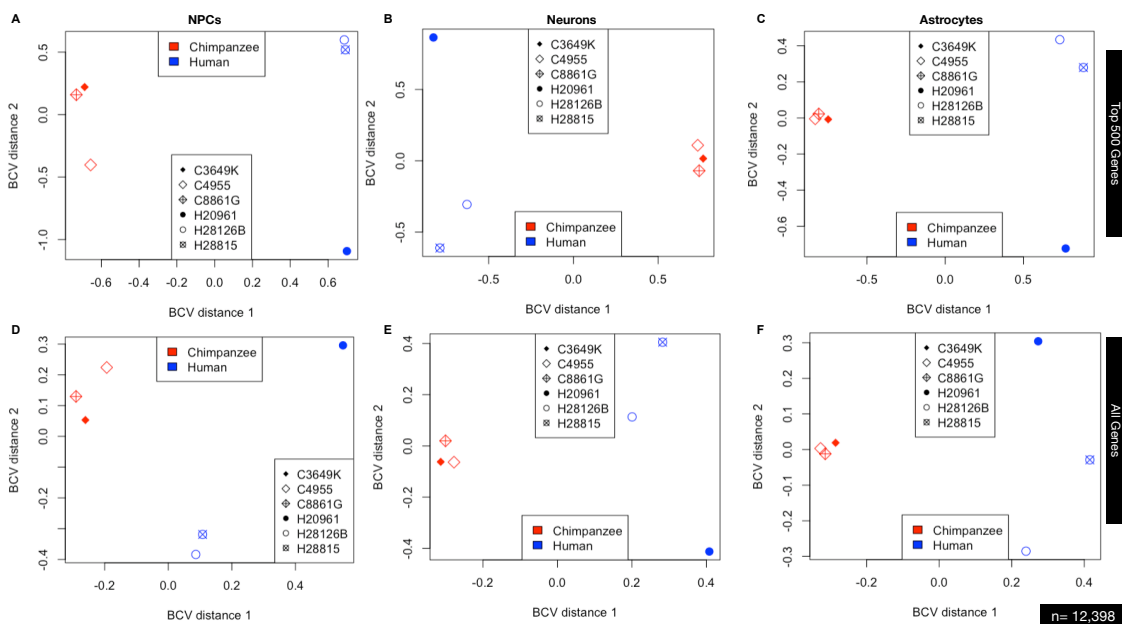

833  
834  
835  
836  
837  
838  
839  
840  
841  
842  
843  
844  
845  
846  
847  
848  
849  
850  
851  
852  
853

**SI Figure 3 | MDS plots of individual cell types (A & D – NPCs, B & E – neurons, C & F – astrocytes).** Plots A-C are for the top 500 most differentially expressed genes while plots D-F are for all genes expressed.

854

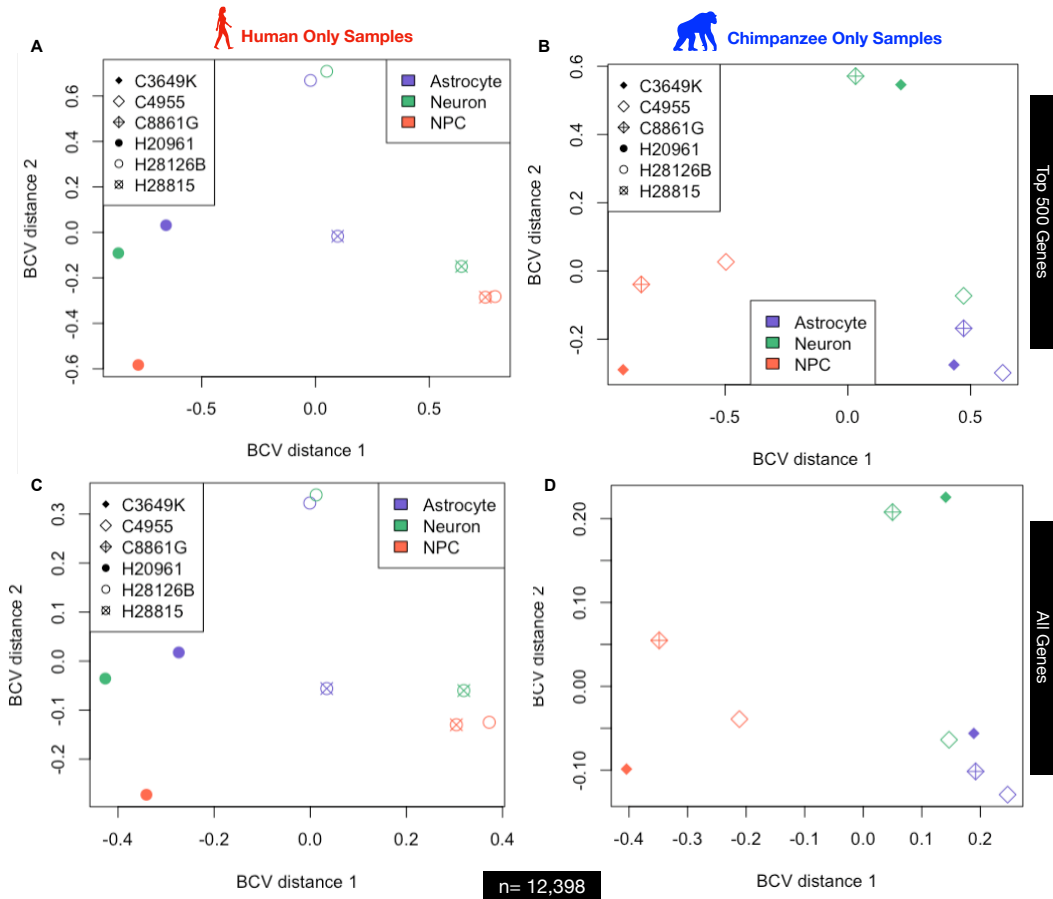

855  
 856  
 857  
 858  
 859  
 860  
 861  
 862  
 863  
 864  
 865  
 866  
 867  
 868  
 869  
 870  
 871  
 872  
 873  
 874

**SI Figure 4 | MDS plots of all A & C) human and B & D) chimpanzee samples by cell type. Plots A & B are for the top 500 most differentially expressed genes while plots C & D are for all genes expressed.**

875

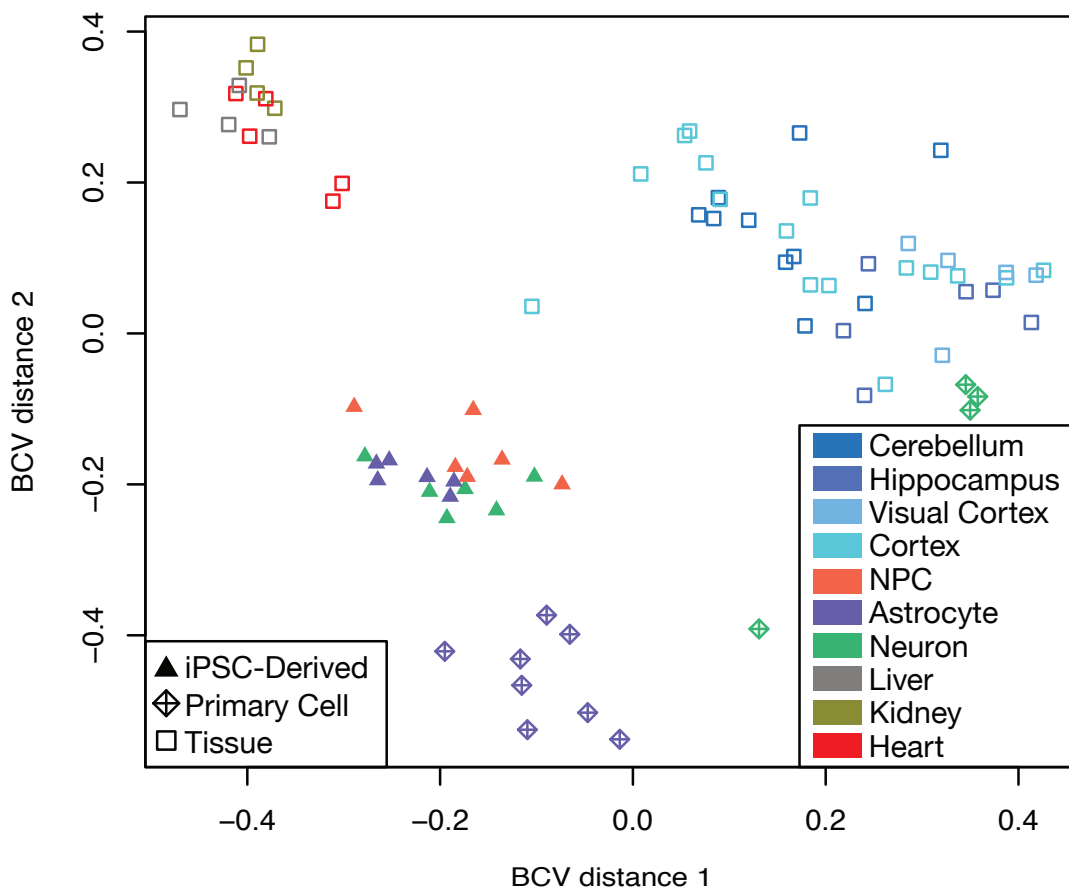

876  
877  
878  
879  
880  
881  
882  
883  
884  
885  
886  
887  
888  
889  
890  
891  
892  
893  
894  
895  
896

**SI Figure 5 | Human and chimpanzee iPSC-derived neural cells resemble primary neural cell types and tissue regions more than non-neuronal tissues.** A PCoA of the iPSC-derived neural cells in comparison to whole-tissue RNA-Seq from four brain regions (cerebellum, hippocampus, prefrontal cortex, and visual cortex) from human and chimpanzee (3 individuals per species) (Babbitt et al., *in prep.*), brain and non-neuronal tissue from human and chimpanzee from (Brawand et al., 2011), as well as that from primary neurons and astrocytes (Consortium, 2012; Davis et al., 2018; Zhang et al., 2016) obtained from the Gene Expression Omnibus (GEO) (Edgar et al., 2002) Short Read Archive (SRA) (GEO accession numbers GSE30352, GSE73721, GSM2071331, GSM2071332, and GSM2071418). Label shape indicates the sample source tissue or cell type. Color refers to cell type or brain region.

897

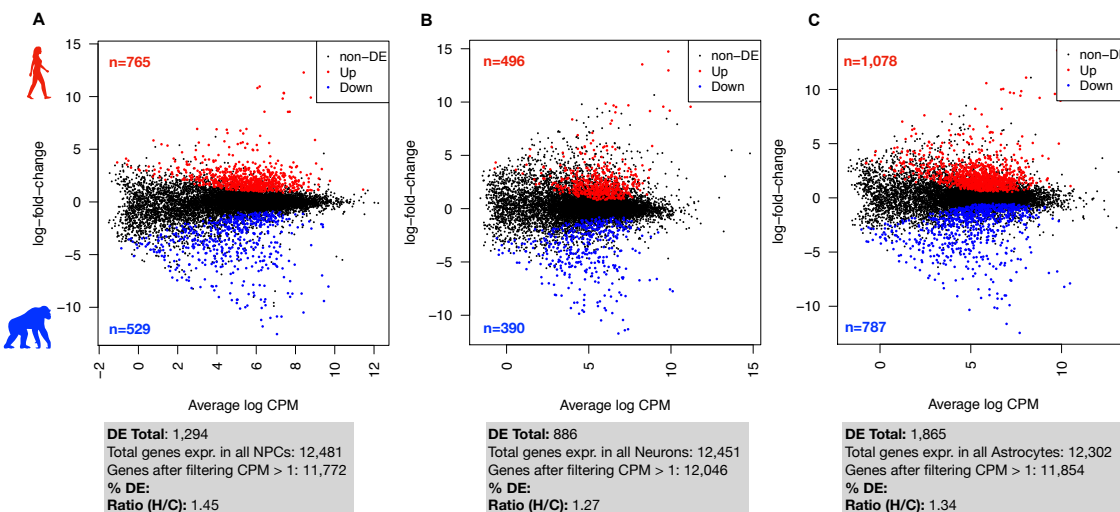

898  
899

900 **SI Figure 6 | Distribution of differentially expressed genes between species for each cell type.** MA plots  
901 of expression of all genes (average log CPM, x-axis) by their relative log fold-change (y-axis) from  
902 TopTags tables of pairwise, interspecies CT-DE comparisons made in edgeR for A) NPCs, B) neurons,  
903 and C) astrocytes. Color indicates differential expression status: black – non-DE, red – DE with higher  
904 expression in human, blue – DE with higher expression in chimpanzee). Number of genes identified as  
905 differentially expressed with higher expression in human and indicated in red text; for chimpanzee, in  
906 blue text.

907  
908  
909  
910  
911  
912  
913  
914  
915  
916  
917  
918  
919  
920  
921  
922  
923  
924  
925  
926  
927  
928  
929  
930  
931  
932



933

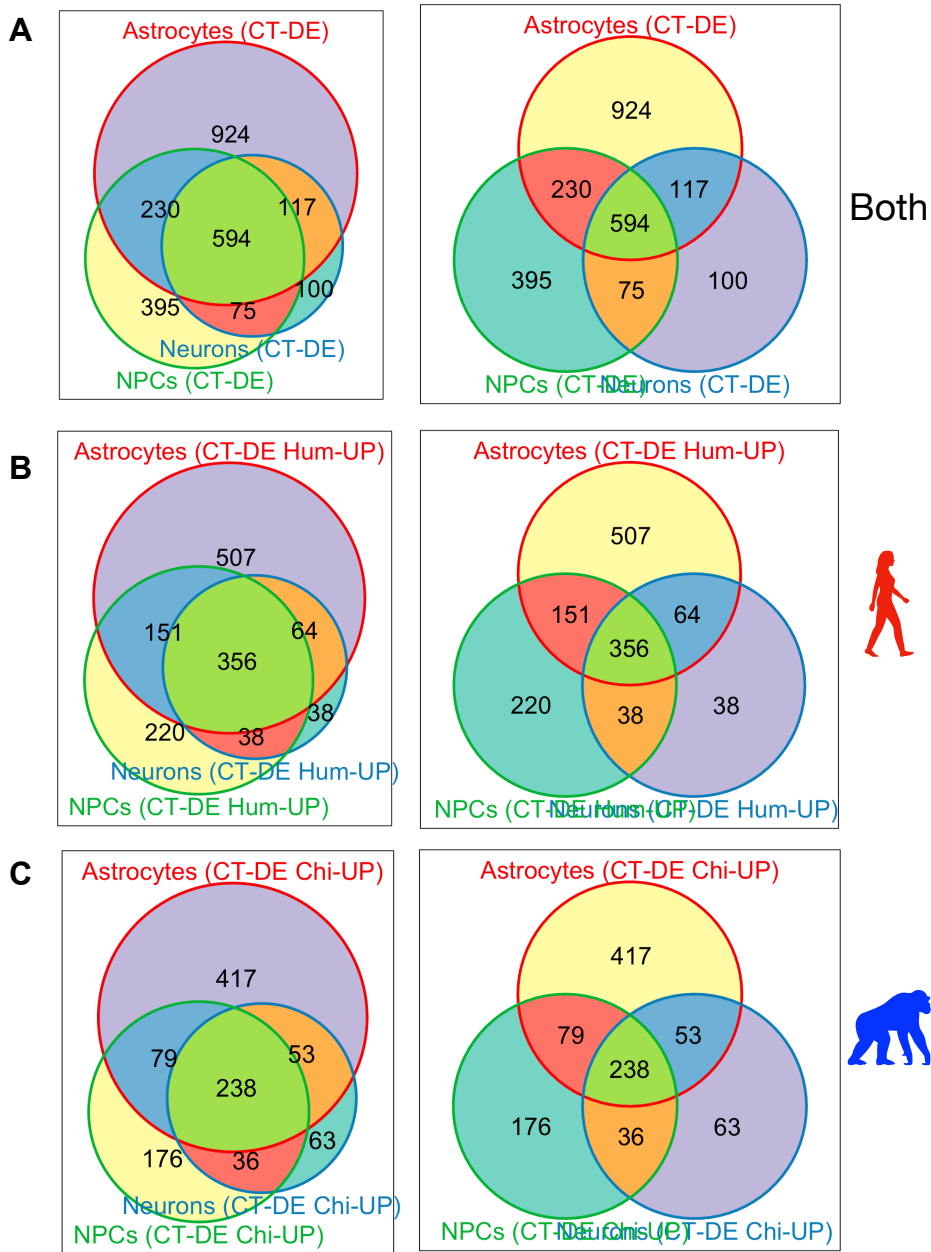

934

935

936

937

938

939

940

941

942

943

944

**SI Figure 7 | Overlap in interspecies CT-DE genes.** Weighted (left column) and unweighted (right column) Venn diagrams made using R package Vennrable of overlap in genes per cell type exhibiting differential expression between species. Venn diagrams are for all CT-DE genes across all CT's (A) and DE genes across all CT-DE comparisons with higher expression in human (B) or chimpanzee (C).

A

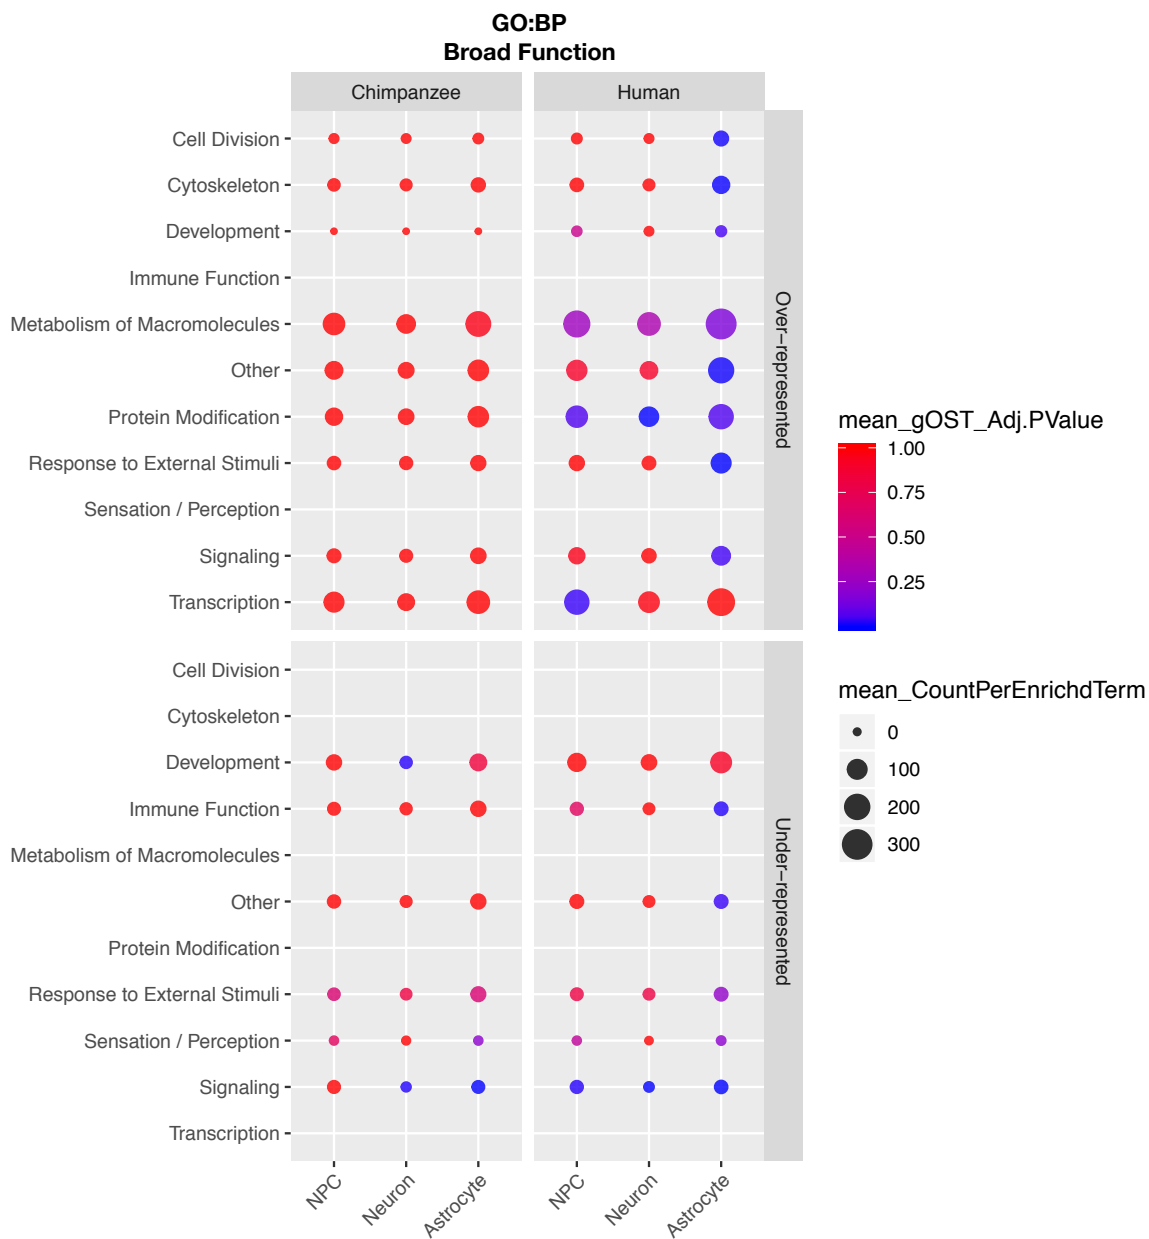

945  
946  
947 **SI Figure 8 | GO Biological Process (BP) enrichments.** Plots of significantly over-represented (top  
948 panels) and under-represented (bottom panels) categories of GO BP terms determined by categorical  
949 enrichment analyses in genes with higher expression in chimpanzee (left panel) and human (right panel)  
950 for each cell type (x-axis). The categories (y-axis) represent groupings of multiple GO BP terms grouped  
951 by their general function. Size indicates the mean count and color indicates the mean adjusted enrichment  
952 p-value for all terms in that category.

953  
954  
955  
956  
957  
958  
959

960 **SI Figure 9 | GO Cellular Component (CC) enrichments.**  
 961

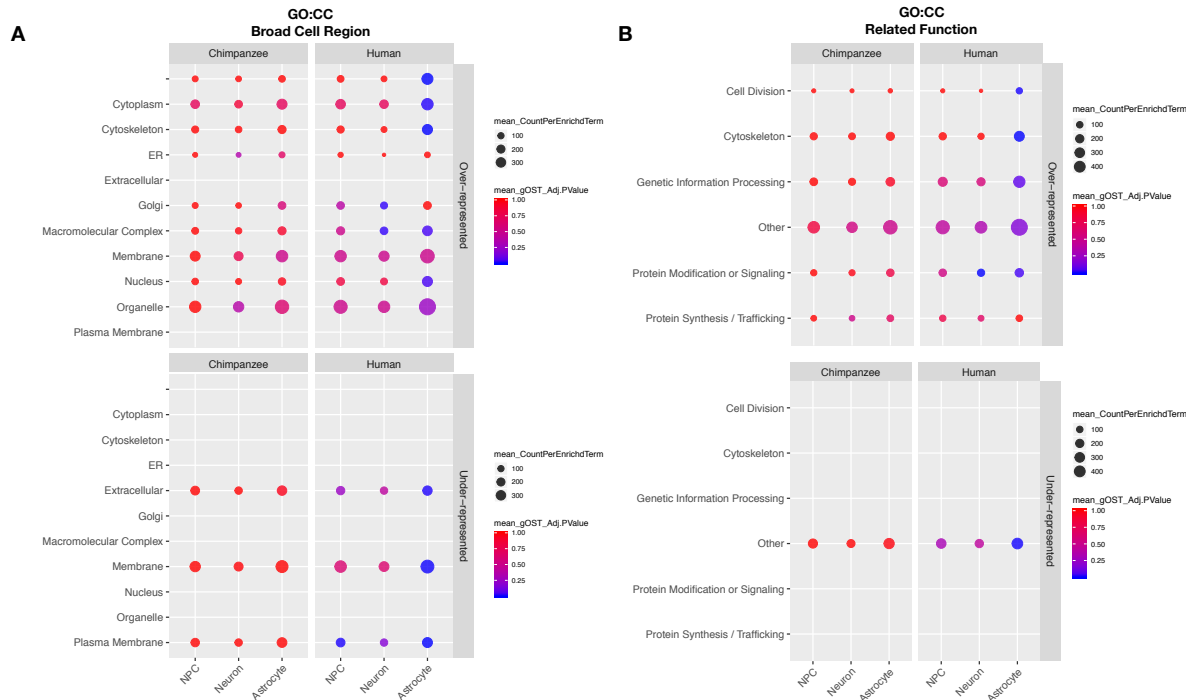

962 **SI Figure 9 | GO Cellular Component (CC) enrichments.** Plots of significantly over-represented (top  
 963 panels) and under-represented (bottom panels) categories of GO CC terms determined by categorical  
 964 enrichment analyses in genes with higher expression in chimpanzee (left panel) and human (right panel)  
 965 for each cell type (x-axis). The categories (y-axis) represent groupings of multiple GO CC terms grouped  
 966 by their A) by their broad cell region and B) functions related to the cellular components enriched. Size  
 967 indicates the mean count and color indicates the mean adjusted enrichment p-value for all terms in that  
 968 category.  
 969

970  
 971  
 972  
 973  
 974  
 975  
 976  
 977  
 978  
 979  
 980  
 981  
 982  
 983  
 984  
 985  
 986  
 987  
 988  
 989

990

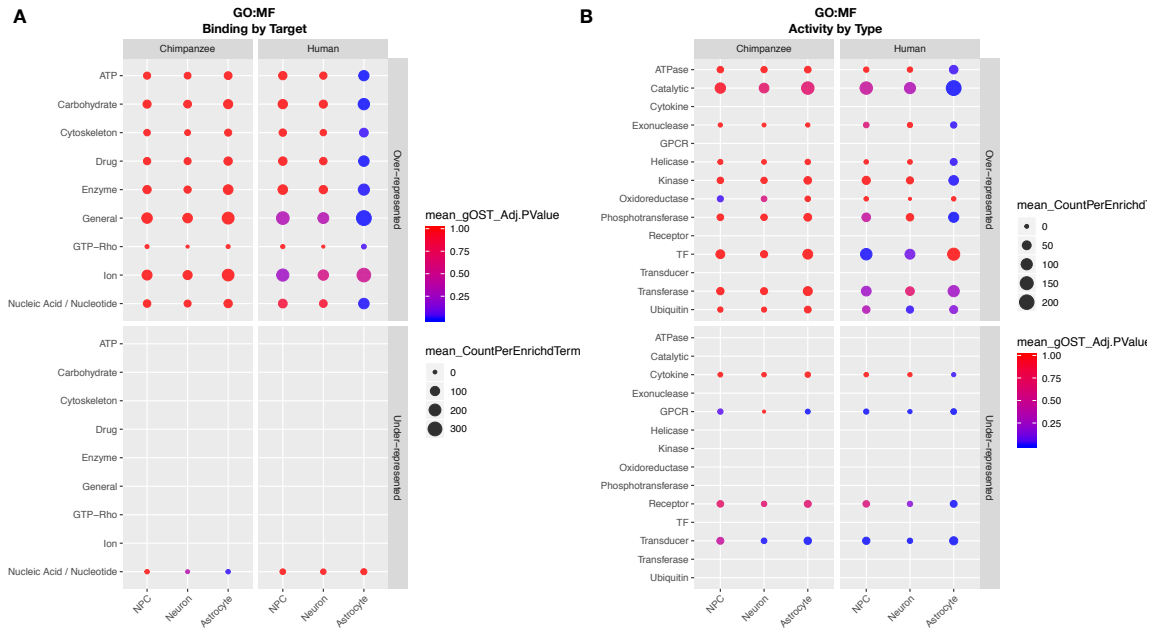

991

992

993

994

995

996

997

998

999

1000

1001

**SI Figure 10 | GO Molecular Function (MF) enrichments.** Plots of significantly over-represented (top panels) and under-represented (bottom panels) categories of GO MF terms determined by categorical enrichment analyses in genes with higher expression in chimpanzee (left panel) and human (right panel) for each cell type (x-axis). The categories (y-axis) represent groupings of multiple GO MF terms grouped by their A) binding activity for particular substrates and B) specificity types of molecular activity. Size indicates the mean count and color indicates the mean adjusted enrichment p-value for all terms in that category.

1002

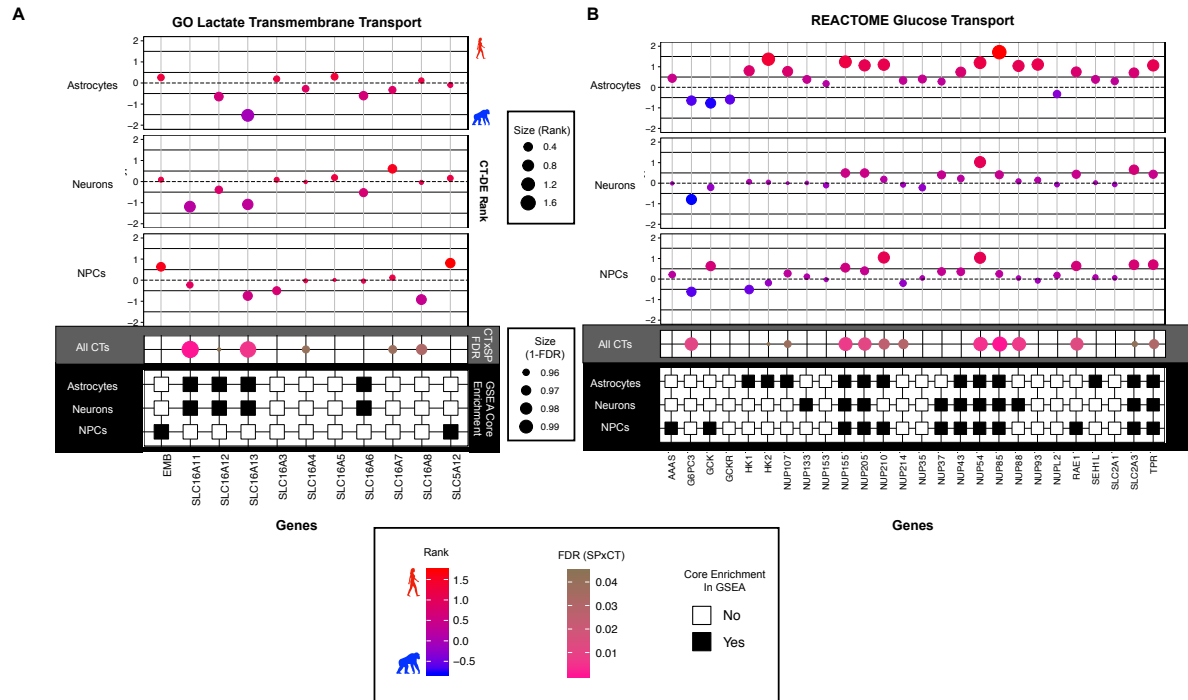

1003

1004

1005

1006

1007

1008

1009

1010

1011

1012

1013

1014

1015

1016

1017

1018

1019

**SI Figure 11 | Neurons and astrocytes exhibit contrasting interspecies differences in lactate and glucose transport.** Comparison of genes involved in the A) GO lactate transmembrane transport and B) REACTOME glucose transport gene sets determined as significantly enriched in one species by GSEA analyses. Each panel (white, grey, and black) indicates significance per gene for one of the functional enrichment analyses used (top/white - interspecies DE by cell type (CT-DE); middle/grey – SPxCT ANOVA-like DE, bottom/black – membership in core enrichment genes of leading edge GSEA analysis). (Top panel) Plot of CT-DE rank [(sign of logFC) x log10(FDR Q-value)] per each gene (x-axis), with values greater than zero indicating higher expression in human and values less than zero indicate higher expression in chimpanzee. Color spectrum and size also indicate rank (red – higher in human, blue – higher in chimpanzee, larger = higher rank). (Dark grey panel) Plot of FDR for each gene in the ANOVA-like SPxCT DE comparison, where color indicates significance (pink – lower/significant, brown – higher/non-significant) and size also indicates significance (1-FDR, larger = more significant). (Black panel) Plot of whether each gene was part of the core set of genes in GSEA leading edge analysis (black – yes, white – no). See SI Table 3 for DE results per gene and SI Table 6 for GSEA results per gene.

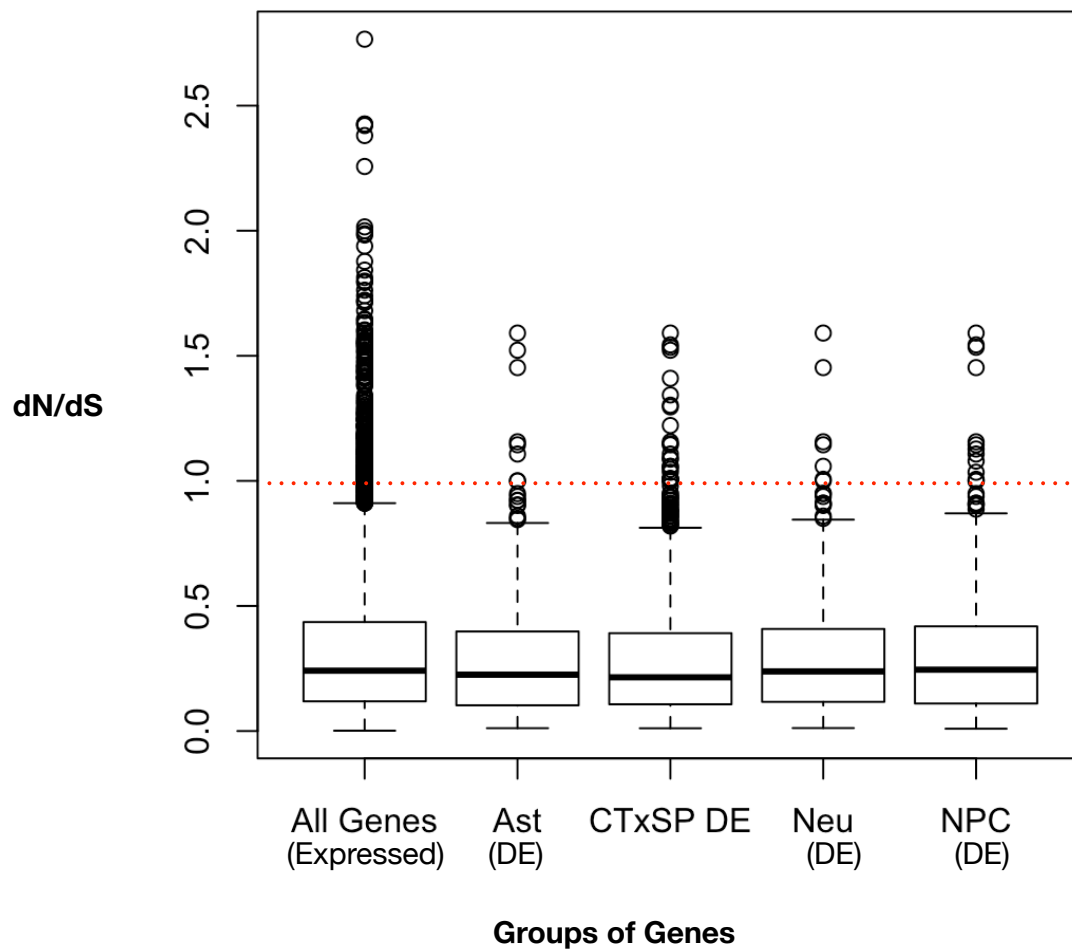

1020  
1021  
1022  
1023  
1024  
1025  
1026  
1027  
1028  
1029  
1030  
1031  
1032  
1033  
1034  
1035  
1036

**SI Figure 12** | Positive selection in the coding regions of genes expressed in iPSC-derived neural cells. In order to determine if genes exhibiting significant interspecies differential expression also had evidence of positive selection in their coding sequences, we used nonsynonymous (dN) and synonymous (dS) nucleotide changes per gene for all genes expressed in iPSC-derived neural cells. A rate of change was calculated for each gene (dN/dS), where a dN/dS > 1 is indicative of positive selection.

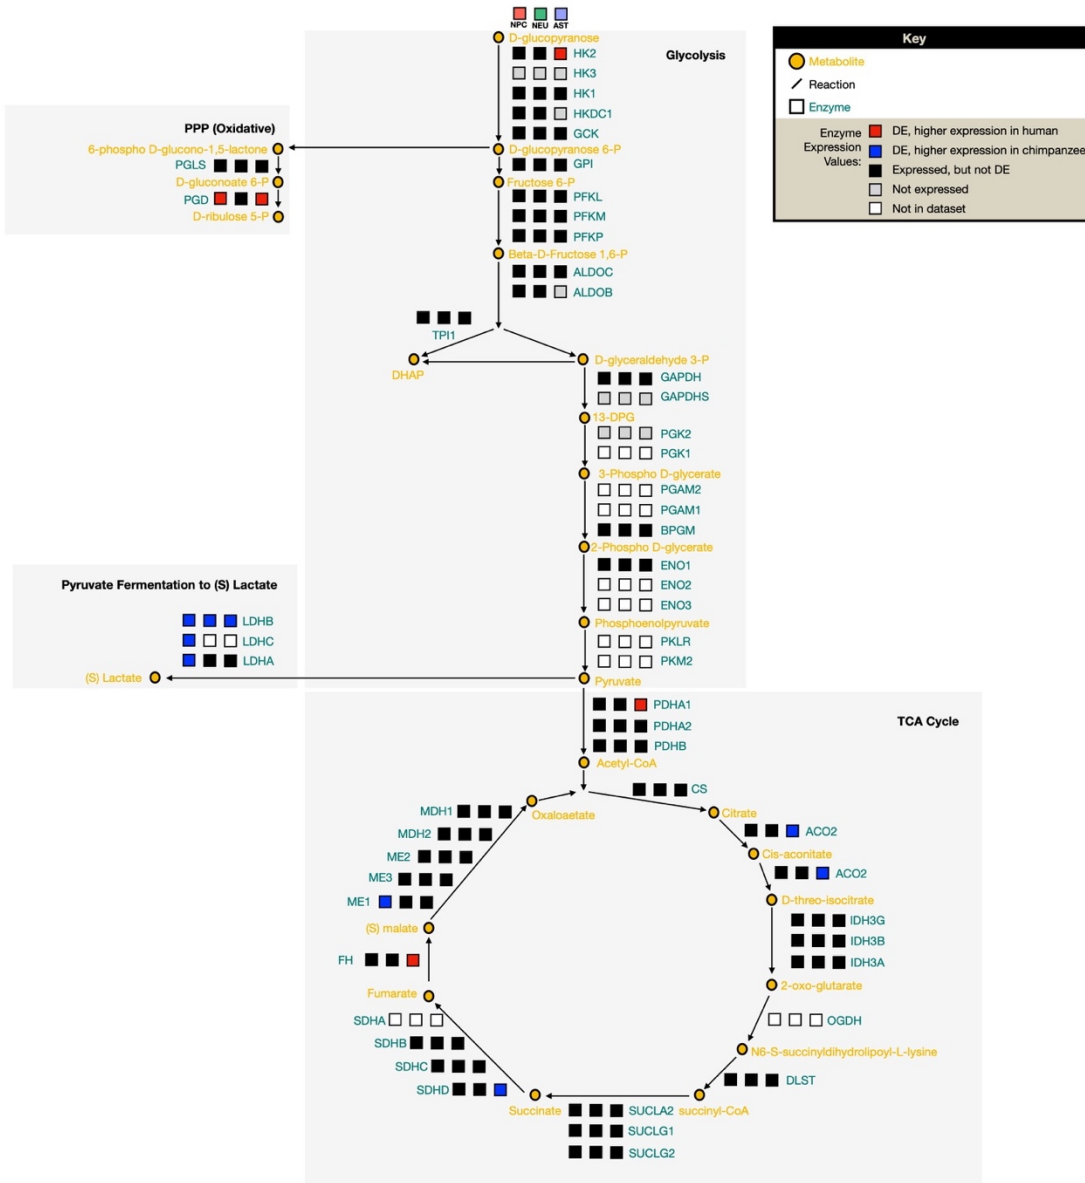

1037  
1038

1039 **SI Figure 13** | Full expression network of sub-pathways in aerobic glycolysis. We constructed a focal set  
 1040 of aerobic glycolysis signaling pathways in order to contextualize our DE results in the framework of a  
 1041 network signaling. A diagram of the major pathways involved in aerobic glycolysis (glycolysis, pentose  
 1042 phosphate pathway (PPP), lactate conversion from pyruvate, and TCA cycle). For each enzyme in the  
 1043 pathway, three blocks indicate expression of this enzyme in each cell type – left to right: NPCs, neurons,  
 1044 astrocytes. Color indicates level of expression (DE and higher in human (red), DE and higher in  
 1045 chimpanzee (blue), not expressed in this cell type (grey), expressed but not DE (black)).

1046

1047

1048 **REFERENCES**

1049

- 1050 Aiello, L. C., & Wheeler, P. (1995). The expensive-tissue hypothesis: the brain and the digestive  
1051 system in human and primate evolution. *Current anthropology*, 36(2), 199-221.
- 1052 Aken, B. L., Achuthan, P., Akanni, W., Amode, M. R., Bernsdorff, F., Bhai, J., . . . Clapham, P.  
1053 (2016). Ensembl 2017. *Nucleic Acids Research*, 45(D1), D635-D642.
- 1054 Almad, A. A., Doreswamy, A., Gross, S. K., Richard, J. P., Huo, Y., Haughey, N., & Maragakis,  
1055 N. J. (2016). Connexin 43 in astrocytes contributes to motor neuron toxicity in  
1056 amyotrophic lateral sclerosis. *Glia*, 64(7), 1154-1169.
- 1057 Almeida, A., Moncada, S., & Bolaños, J. P. (2004). Nitric oxide switches on glycolysis through  
1058 the AMP protein kinase and 6-phosphofructo-2-kinase pathway. *Nature Cell Biology*,  
1059 6(1), 45.
- 1060 Amiri, A., Coppola, G., Scuderi, S., Wu, F., Roychowdhury, T., Liu, F., . . . Song, L. (2018).  
1061 Transcriptome and epigenome landscape of human cortical development modeled in  
1062 organoids. *Science*, 362(6420).
- 1063 Anders, S., Pyl, P. T., & Huber, W. (2015). HTSeq—a Python framework to work with high-  
1064 throughput sequencing data. *Bioinformatics*, 31(2), 166-169.
- 1065 Antonazzo, G., Attrill, H., Brown, N., Marygold, S. J., McQuilton, P., Ponting, L., . . . Tweedie,  
1066 S. (2017). Expansion of the Gene Ontology knowledgebase and resources. *Nucleic Acids  
1067 Research*.
- 1068 Ashburner, M., Ball, C. A., Blake, J. A., Botstein, D., Butler, H., Cherry, J. M., . . . Eppig, J. T.  
1069 (2000). Gene Ontology: tool for the unification of biology. *Nature Genetics*, 25(1), 25.
- 1070 Babbitt, C. C., Fedrigo, O., Pfefferle, A. D., Boyle, A. P., Horvath, J. E., Furey, T. S., & Wray,  
1071 G. A. (2010). Both noncoding and protein-coding RNAs contribute to gene expression  
1072 evolution in the primate brain. *Genome Biology and Evolution*, 2, 67-79.
- 1073 Babbitt, C. C., Warner, L. R., Fedrigo, O., Wall, C. E., & Wray, G. A. (2011). Genomic  
1074 signatures of diet-related shifts during human origins. *Proceedings of the Royal Society  
1075 B: Biological Sciences*, 278(1708), 961-969.
- 1076 Bakken, T. E., Miller, J. A., Luo, R., Bernard, A., Bennett, J. L., Lee, C.-K., . . . Sunkin, S. M.  
1077 (2015). Spatiotemporal dynamics of the postnatal developing primate brain  
1078 transcriptome. *Human molecular genetics*, 24(15), 4327-4339.
- 1079 Bauernfeind, A. L., & Babbitt, C. C. (2014). The appropriation of glucose through primate  
1080 neurodevelopment. *Journal of Human Evolution*, 77, 132-140.
- 1081 Bauernfeind, A. L., Soderblom, E. J., Turner, M. E., Moseley, M. A., Ely, J. J., Hof, P. R., . . .  
1082 Babbitt, C. C. (2015). Evolutionary divergence of gene and protein expression in the  
1083 brains of humans and chimpanzees. *Genome Biology and Evolution*, 7(8), 2276-2288.
- 1084 Blake, L. E., Thomas, S. M., Blischak, J. D., Hsiao, C. J., Chavarria, C., Myrthil, M., . . .  
1085 Pavlovic, B. J. (2018). A comparative study of endoderm differentiation in humans and  
1086 chimpanzees. *Genome Biology*, 19(1), 162.
- 1087 Blekhman, R., Oshlack, A., Chabot, A. E., Smyth, G. K., & Gilad, Y. (2008). Gene regulation in  
1088 primates evolves under tissue-specific selection pressures. *PLoS Genetics*, 4(11),  
1089 e1000271.
- 1090 Brawand, D., Soumillon, M., Necsulea, A., Julien, P., Csárdi, G., Harrigan, P., . . . Kircher, M.  
1091 (2011). The evolution of gene expression levels in mammalian organs. *Nature*,  
1092 478(7369), 343.



- 1093 Brown, A. M., Wender, R., & Ransom, B. R. (2001). Metabolic substrates other than glucose  
1094 support axon function in central white matter. *Journal of Neuroscience Research*, *66*(5),  
1095 839-843.
- 1096 Brown, F., Harris, J., Leakey, R., & Walker, A. (1985). Early Homo erectus skeleton from west  
1097 lake Turkana, Kenya. *Nature*, *316*(6031), 788.
- 1098 Burrows, C. K., Banovich, N. E., Pavlovic, B. J., Patterson, K., Romero, I. G., Pritchard, J. K., &  
1099 Gilad, Y. (2016). Genetic variation, not cell type of origin, underlies the majority of  
1100 identifiable regulatory differences in iPSCs. *PLoS Genetics*, *12*(1), e1005793.
- 1101 Camp, J. G., Badsha, F., Florio, M., Kanton, S., Gerber, T., Wilsch-Bräuninger, M., . . .  
1102 Lancaster, M. (2015). Human cerebral organoids recapitulate gene expression programs  
1103 of fetal neocortex development. *Proceedings of the National Academy of Sciences*,  
1104 *112*(51), 15672-15677.
- 1105 Charnov, E. L., & Berrigan, D. (1993). Why do female primates have such long lifespans and so  
1106 few babies? Or life in the slow lane. *Evolutionary Anthropology*, *1*(6), 191-194.
- 1107 Cho, I. K., Yang, B., Forest, C., Qian, L., & Chan, A. W. (2019). Amelioration of Huntington's  
1108 disease phenotype in astrocytes derived from iPSC-derived neural progenitor cells of  
1109 Huntington's disease monkeys. *PLoS One*, *14*(3), e0214156.
- 1110 Consortium, E. P. (2012). An integrated encyclopedia of DNA elements in the human genome.  
1111 *Nature*, *489*(7414), 57-74. doi:10.1038/nature11247
- 1112 Davis, C. A., Hitz, B. C., Sloan, C. A., Chan, E. T., Davidson, J. M., Gabdank, I., . . . Cherry, J.  
1113 M. (2018). The Encyclopedia of DNA elements (ENCODE): data portal update. *Nucleic  
1114 Acids Research*, *46*(D1), D794-D801. doi:10.1093/nar/gkx1081
- 1115 di Domenico, A., Carola, G., Calatayud, C., Pons-Espinal, M., Muñoz, J. P., Richaud-Patin, Y., .  
1116 . . Parameswaran, J. (2019). Patient-specific iPSC-derived astrocytes contribute to non-  
1117 cell-autonomous neurodegeneration in Parkinson's disease. *Stem Cell Reports*, *12*(2),  
1118 213-229.
- 1119 Diniz, L. P., Almeida, J. C., Tortelli, V., Lopes, C. V., Setti-Perdigão, P., Stipursky, J., . . .  
1120 Alves-Leon, S. V. (2012). Astrocyte-induced synaptogenesis is mediated by transforming  
1121 growth factor  $\beta$  signaling through modulation of D-serine levels in cerebral cortex  
1122 neurons. *Journal of Biological Chemistry*, *287*(49), 41432-41445.
- 1123 Edgar, R., Domrachev, M., & Lash, A. E. (2002). Gene Expression Omnibus: NCBI gene  
1124 expression and hybridization array data repository. *Nucleic Acids Research*, *30*(1), 207-  
1125 210. doi:10.1093/nar/30.1.207
- 1126 Eres, I. E., Luo, K., Hsiao, C. J., Blake, L. E., & Gilad, Y. (2019). Reorganization of 3D genome  
1127 structure may contribute to gene regulatory evolution in primates. *PLoS Genetics*, *15*(7),  
1128 e1008278.
- 1129 Fabregat, A., Jupe, S., Matthews, L., Sidiropoulos, K., Gillespie, M., Garapati, P., . . .  
1130 D'Eustachio, P. (2018). The Reactome Pathway Knowledgebase. *Nucleic Acids Research*,  
1131 *46*(D1), D649-D655. doi:10.1093/nar/gkx1132
- 1132 Fagundes, N. J., Ray, N., Beaumont, M., Neuenschwander, S., Salzano, F. M., Bonatto, S. L., &  
1133 Excoffier, L. (2007). Statistical evaluation of alternative models of human evolution.  
1134 *Proceedings of the National Academy of Sciences of the United States of America*,  
1135 *104*(45), 17614-17619.
- 1136 Goldberg, A., Wildman, D. E., Schmidt, T. R., Hüttemann, M., Goodman, M., Weiss, M. L., &  
1137 Grossman, L. I. (2003). Adaptive evolution of cytochrome c oxidase subunit VIII in

- 1138 anthropoid primates. *Proceedings of the National Academy of Sciences of the United*  
1139 *States of America*, 100(10), 5873-5878.
- 1140 Grossman, L. I., Schmidt, T. R., Wildman, D. E., & Goodman, M. (2001). Molecular evolution  
1141 of aerobic energy metabolism in primates. *Molecular phylogenetics and evolution*, 18(1),  
1142 26-36.
- 1143 Grossman, L. I., Wildman, D. E., Schmidt, T. R., & Goodman, M. (2004). Accelerated evolution  
1144 of the electron transport chain in anthropoid primates. *TRENDS in Genetics*, 20(11), 578-  
1145 585.
- 1146 Haygood, R., Babbitt, C. C., Fedrigo, O., & Wray, G. A. (2010). Contrasts between adaptive  
1147 coding and noncoding changes during human evolution. *Proceedings of the National*  
1148 *Academy of Sciences of the United States of America*, 200911249.
- 1149 Haygood, R., Fedrigo, O., Hanson, B., Yokoyama, K.-D., & Wray, G. A. (2007). Promoter  
1150 regions of many neural-and nutrition-related genes have experienced positive selection  
1151 during human evolution. *Nature Genetics*, 39(9), 1140.
- 1152 Herculano-Houzel, S. (2011). Scaling of brain metabolism with a fixed energy budget per  
1153 neuron: implications for neuronal activity, plasticity and evolution. *PLoS One*, 6(3),  
1154 e17514.
- 1155 Herrero, J., Muffato, M., Beal, K., Fitzgerald, S., Gordon, L., Pignatelli, M., . . . Brent, S. (2016).  
1156 Ensembl comparative genomics resources. *Database*, 2016.
- 1157 Herrero-Mendez, A., Almeida, A., Fernández, E., Maestre, C., Moncada, S., & Bolaños, J. P.  
1158 (2009). The bioenergetic and antioxidant status of neurons is controlled by continuous  
1159 degradation of a key glycolytic enzyme by APC/C–Cdh1. *Nature Cell Biology*, 11(6),  
1160 747.
- 1161 Hofman, M. A. (1983). Energy metabolism, brain size and longevity in mammals. *The Quarterly*  
1162 *Review of Biology*, 58(4), 495-512.
- 1163 Horvath, J. E., Ramachandran, G. L., Fedrigo, O., Nielsen, W. J., Babbitt, C. C., Clair, E. M. S., .  
1164 . . Wall, C. E. (2014). Genetic comparisons yield insight into the evolution of enamel  
1165 thickness during human evolution. *Journal of Human Evolution*, 73, 75-87.
- 1166 Hüttemann, M., Helling, S., Sanderson, T. H., Sinkler, C., Samavati, L., Mahapatra, G., . . .  
1167 Ramzan, R. (2012). Regulation of mitochondrial respiration and apoptosis through cell  
1168 signaling: cytochrome c oxidase and cytochrome c in ischemia/reperfusion injury and  
1169 inflammation. *Biochimica et Biophysica Acta (BBA)-Bioenergetics*, 1817(4), 598-609.
- 1170 Kanton, S., Boyle, M. J., He, Z., Santel, M., Weigert, A., Sanchís-Calleja, F., . . . Han, D. (2019).  
1171 Organoid single-cell genomic atlas uncovers human-specific features of brain  
1172 development. *Nature*, 574(7778), 418-422.
- 1173 Karbowski, J. (2007). Global and regional brain metabolic scaling and its functional  
1174 consequences. *BMC Biology*, 5(1), 18.
- 1175 Kersey, P. J., Allen, J. E., Allot, A., Barba, M., Boddu, S., Bolt, B. J., . . . Grabmueller, C.  
1176 (2017). Ensembl Genomes 2018: an integrated omics infrastructure for non-vertebrate  
1177 species. *Nucleic Acids Research*, 46(D1), D802-D808.
- 1178 Khaitovich, P., Muetzel, B., She, X., Lachmann, M., Hellmann, I., Dietzsch, J., . . . Enard, W.  
1179 (2004). Regional patterns of gene expression in human and chimpanzee brains. *Genome*  
1180 *Research*, 14(8), 1462-1473.
- 1181 Khrameeva, E., Kurochkin, I., Han, D., Guijarro, P., Kanton, S., Santel, M., . . . Sabirov, M.  
1182 (2020). Single-cell-resolution transcriptome map of human, chimpanzee, bonobo, and  
1183 macaque brains. *Genome Research*, 30(5), 776-789.

- 1184 Kinsella, R. J., Kähäri, A., Haider, S., Zamora, J., Proctor, G., Spudich, G., . . . Kerhornou, A.  
1185 (2011). Ensembl BioMarts: a hub for data retrieval across taxonomic space. *Database*,  
1186 2011.
- 1187 Konopka, G., Friedrich, T., Davis-Turak, J., Winden, K., Oldham, M. C., Gao, F., . . . Preuss, T.  
1188 M. (2012). Human-specific transcriptional networks in the brain. *Neuron*, 75(4), 601-617.
- 1189 Kosiol, C., Vinař, T., da Fonseca, R. R., Hubisz, M. J., Bustamante, C. D., Nielsen, R., & Siepel,  
1190 A. (2008). Patterns of positive selection in six mammalian genomes. *PLoS Genetics*, 4(8),  
1191 e1000144.
- 1192 Kuzawa, C. W., Chugani, H. T., Grossman, L. I., Lipovich, L., Muzik, O., Hof, P. R., . . . Lange,  
1193 N. (2014). Metabolic costs and evolutionary implications of human brain development.  
1194 *Proceedings of the National Academy of Sciences*, 111(36), 13010-13015.
- 1195 Langmead, B., & Salzberg, S. L. (2012). Fast gapped-read alignment with Bowtie 2. *Nature*  
1196 *Methods*, 9(4), 357.
- 1197 Leonard, W. R., & Robertson, M. L. (1994). Evolutionary perspectives on human nutrition: the  
1198 influence of brain and body size on diet and metabolism. *American Journal of Human*  
1199 *Biology*, 6(1), 77-88.
- 1200 Leonard, W. R., & Robertson, M. L. (1997). Comparative primate energetics and hominid  
1201 evolution. *American Journal of Physical Anthropology: The Official Publication of the*  
1202 *American Association of Physical Anthropologists*, 102(2), 265-281.
- 1203 Leonard, W. R., Robertson, M. L., Snodgrass, J. J., & Kuzawa, C. W. (2003). Metabolic  
1204 correlates of hominid brain evolution. *Comparative Biochemistry and Physiology Part A:*  
1205 *Molecular & Integrative Physiology*, 136(1), 5-15.
- 1206 Liberzon, A., Subramanian, A., Pinchback, R., Thorvaldsdóttir, H., Tamayo, P., & Mesirov, J. P.  
1207 (2011). Molecular signatures database (MSigDB) 3.0. *Bioinformatics*, 27(12), 1739-1740.
- 1208 Luo, C., Lancaster, M. A., Castanon, R., Nery, J. R., Knoblich, J. A., & Ecker, J. R. (2016).  
1209 Cerebral organoids recapitulate epigenomic signatures of the human fetal brain. *Cell*  
1210 *Reports*, 17(12), 3369-3384.
- 1211 Mächler, P., Wyss, M. T., Elsayed, M., Stobart, J., Gutierrez, R., von Faber-Castell, A., . . .  
1212 Romero-Gómez, I. (2016). In vivo evidence for a lactate gradient from astrocytes to  
1213 neurons. *Cell Metabolism*, 23(1), 94-102.
- 1214 Magistretti, P. J., & Allaman, I. (2015). A cellular perspective on brain energy metabolism and  
1215 functional imaging. *Neuron*, 86(4), 883-901.
- 1216 Martin, R. D. (1981). Relative brain size and basal metabolic rate in terrestrial vertebrates.  
1217 *Nature*, 293(5827), 57.
- 1218 Maxson, M. E., & Grinstein, S. (2014). The vacuolar-type H<sup>+</sup>-ATPase at a glance—more than a  
1219 proton pump. In: *The Company of Biologists Ltd*.
- 1220 McHenry, H. M. (1992). Body size and proportions in early hominids. *American Journal of*  
1221 *Physical Anthropology*, 87(4), 407-431.
- 1222 McHenry, H. M. (1994). Tempo and mode in human evolution. *Proceedings of the National*  
1223 *Academy of Sciences*, 91(15), 6780-6786.
- 1224 McKenzie, A. T., Wang, M., Hauberg, M. E., Fullard, J. F., Kozlenkov, A., Keenan, A., . . .  
1225 Zhang, B. (2018). Brain Cell Type Specific Gene Expression and Co-expression Network  
1226 Architectures. *Scientific Reports*, 8(1), 8868. doi:10.1038/s41598-018-27293-5
- 1227 Meyer-Franke, A., Kaplan, M. R., Pfeifer, F. W., & Barres, B. A. (1995). Characterization of the  
1228 signaling interactions that promote the survival and growth of developing retinal ganglion  
1229 cells in culture. *Neuron*, 15(4), 805-819.

- 1230 Mink, J. W., Blumenshine, R. J., & Adams, D. B. (1981). Ratio of central nervous system to  
1231 body metabolism in vertebrates: its constancy and functional basis. *American Journal of*  
1232 *Physiology-Regulatory, Integrative and Comparative Physiology*, 241(3), R203-R212.
- 1233 Muntané, G., Horvath, J. E., Hof, P. R., Ely, J. J., Hopkins, W. D., Raghanti, M. A., . . .  
1234 Sherwood, C. C. (2014). Analysis of synaptic gene expression in the neocortex of  
1235 primates reveals evolutionary changes in glutamatergic neurotransmission. *Cerebral*  
1236 *Cortex*, 25(6), 1596-1607.
- 1237 Nedergaard, M., Ransom, B., & Goldman, S. A. (2003). New roles for astrocytes: redefining the  
1238 functional architecture of the brain. *Trends in neurosciences*, 26(10), 523-530.
- 1239 Nelson, D. L., Lehninger, A. L., & Cox, M. M. (2008). *Lehninger principles of biochemistry*:  
1240 Macmillan.
- 1241 Ogata, H., Goto, S., Sato, K., Fujibuchi, W., Bono, H., & Kanehisa, M. (1999). KEGG: Kyoto  
1242 encyclopedia of genes and genomes. *Nucleic Acids Research*, 27(1), 29-34.
- 1243 Oldham, M. C., Horvath, S., & Geschwind, D. H. (2006). Conservation and evolution of gene  
1244 coexpression networks in human and chimpanzee brains. *Proceedings of the National*  
1245 *Academy of Sciences of the United States of America*, 103(47), 17973-17978.
- 1246 Pamarthy, S., Kulshrestha, A., Katara, G. K., & Beaman, K. D. (2018). The curious case of  
1247 vacuolar ATPase: regulation of signaling pathways. *Molecular cancer*, 17(1), 41.
- 1248 Pavlovic, B. J., Blake, L. E., Roux, J., Chavarria, C., & Gilad, Y. (2018). A comparative  
1249 assessment of human and chimpanzee iPSC-derived cardiomyocytes with primary heart  
1250 tissues. *Scientific Reports*, 8(1), 15312.
- 1251 Pellerin, L., & Magistretti, P. J. (1994). Glutamate uptake into astrocytes stimulates aerobic  
1252 glycolysis: a mechanism coupling neuronal activity to glucose utilization. *Proceedings of*  
1253 *the National Academy of Sciences*, 91(22), 10625-10629.
- 1254 Penney, J., Ralvenius, W. T., & Tsai, L.-H. (2019). Modeling Alzheimer's disease with iPSC-  
1255 derived brain cells. *Molecular psychiatry*, 1-20.
- 1256 Peters, C. R. (2007). Theoretical and actualistic ecobotanical perspectives on early hominin diets  
1257 and paleoecology. *Evolution of the human diet: the known, the unknown, and the*  
1258 *unknowable*, 233-261.
- 1259 Pizzollo, J., Nielsen, W. J., Shibata, Y., Safi, A., Crawford, G. E., Wray, G. A., & Babbitt, C. C.  
1260 (2018). Comparative serum challenges show divergent patterns of gene expression and  
1261 open chromatin in human and chimpanzee. *Genome Biology and Evolution*, 10(3), 826-  
1262 839.
- 1263 Pond, S. L. K., Frost, S. D. W., & Muse, S. V. (2004). HyPhy: hypothesis testing using  
1264 phylogenies. *Bioinformatics*, 21(5), 676-679. doi:10.1093/bioinformatics/bti079
- 1265 Pontzer, H., Raichlen, D. A., Gordon, A. D., Schroepfer-Walker, K. K., Hare, B., O'Neill, M. C.,  
1266 . . . Isler, K. (2014). Primate energy expenditure and life history. *Proceedings of the*  
1267 *National Academy of Sciences of the United States of America*, 111(4), 1433-1437.
- 1268 Preuss, T. M. (2012). Human brain evolution: from gene discovery to phenotype discovery.  
1269 *Proceedings of the National Academy of Sciences*, 109(Supplement 1), 10709-10716.
- 1270 Raichle, M. E. (2010). Two views of brain function. *Trends in cognitive sciences*, 14(4), 180-  
1271 190.
- 1272 Raudvere, U., Kolberg, L., Kuzmin, I., Arak, T., Adler, P., Peterson, H., & Vilo, J. (2019).  
1273 g:Profiler: a web server for functional enrichment analysis and conversions of gene lists  
1274 (2019 update). *Nucleic Acids Research*, 47(W1), W191-W198. doi:10.1093/nar/gkz369

- 1275 Reimand, J., Isserlin, R., Voisin, V., Kucera, M., Tannus-Lopes, C., Rostamianfar, A., . . . Bader,  
1276 G. D. (2019). Pathway enrichment analysis and visualization of omics data using  
1277 g:Profiler, GSEA, Cytoscape and EnrichmentMap. *Nature Protocols*, *14*(2), 482-517.  
1278 doi:10.1038/s41596-018-0103-9
- 1279 Robinson, M. D., McCarthy, D. J., & Smyth, G. K. (2010). edgeR: a Bioconductor package for  
1280 differential expression analysis of digital gene expression data. *Bioinformatics*, *26*(1),  
1281 139-140.
- 1282 Romero, I. G., Pavlovic, B. J., Hernando-Herraez, I., Zhou, X., Ward, M. C., Banovich, N. E., . .  
1283 . Mitrano, A. (2015). A panel of induced pluripotent stem cells from chimpanzees: a  
1284 resource for comparative functional genomics. *Elife*, *4*, e07103.
- 1285 Romero, P., Wagg, J., Green, M. L., Kaiser, D., Krummenacker, M., & Karp, P. D. (2005).  
1286 Computational prediction of human metabolic pathways from the complete human  
1287 genome. *Genome Biology*, *6*(1), R2.
- 1288 Schaffner, S. F., Foo, C., Gabriel, S., Reich, D., Daly, M. J., & Altshuler, D. (2005). Calibrating  
1289 a coalescent simulation of human genome sequence variation. *Genome Research*, *15*(11),  
1290 1576-1583.
- 1291 Schneider, V. A., Graves-Lindsay, T., Howe, K., Bouk, N., Chen, H.-C., Kitts, P. A., . . .  
1292 Albracht, D. (2017). Evaluation of GRCh38 and de novo haploid genome assemblies  
1293 demonstrates the enduring quality of the reference assembly. *Genome Research*.
- 1294 Shea, J. J. (2007). Lithic archaeology, or, what stone tools can (and can't) tell us about early  
1295 hominin diets. *Evolution of the human diet: the known, the unknown and the unknowable*,  
1296 321-351.
- 1297 Snodgrass, J. J., Leonard, W. R., & Robertson, M. L. (2007). Primate bioenergetics: an  
1298 evolutionary perspective. In *Primate origins: adaptations and evolution* (pp. 703-737):  
1299 Springer.
- 1300 Sonntag, K.-C., Ryu, W.-I., Amirault, K. M., Healy, R. A., Siegel, A. J., McPhie, D. L., . . .  
1301 Cohen, B. M. (2017). Late-onset Alzheimer's disease is associated with inherent changes  
1302 in bioenergetics profiles. *Scientific Reports*, *7*(1), 14038.
- 1303 Stearns, S. (1992). The evolution of life histories. In: Oxford Univ. Press.
- 1304 Stringer, C. B., & Andrews, P. (1988). Genetic and fossil evidence for the origin of modern  
1305 humans. *Science*, *239*(4845), 1263-1268.
- 1306 Subramanian, A., Tamayo, P., Mootha, V. K., Mukherjee, S., Ebert, B. L., Gillette, M. A., . . .  
1307 Lander, E. S. (2005). Gene set enrichment analysis: a knowledge-based approach for  
1308 interpreting genome-wide expression profiles. *Proceedings of the National Academy of  
1309 Sciences*, *102*(43), 15545-15550.
- 1310 Tekkök, S. B., Brown, A. M., Westenbroek, R., Pellerin, L., & Ransom, B. R. (2005). Transfer  
1311 of glycogen-derived lactate from astrocytes to axons via specific monocarboxylate  
1312 transporters supports mouse optic nerve activity. *Journal of Neuroscience Research*,  
1313 *81*(5), 644-652.
- 1314 Uddin, M., Goodman, M., Erez, O., Romero, R., Liu, G., Islam, M., . . . Wildman, D. E. (2008).  
1315 Distinct genomic signatures of adaptation in pre-and postnatal environments during  
1316 human evolution. *Proceedings of the National Academy of Sciences*, *105*(9), 3215-3220.
- 1317 Vander Heiden, M. G., Cantley, L. C., & Thompson, C. B. (2009). Understanding the Warburg  
1318 effect: the metabolic requirements of cell proliferation. *Science*, *324*(5930), 1029-1033.

- 1319 Vander Heiden, M. G., Locasale, J. W., Swanson, K. D., Sharfi, H., Heffron, G. J., Amador-  
1320 Noguez, D., . . . Asara, J. M. (2010). Evidence for an alternative glycolytic pathway in  
1321 rapidly proliferating cells. *Science*, *329*(5998), 1492-1499.
- 1322 Varki, A., & Altheide, T. K. (2005). Comparing the human and chimpanzee genomes: searching  
1323 for needles in a haystack. *Genome Research*, *15*(12), 1746-1758.
- 1324 Varki, N. M., & Varki, A. (2015). On the apparent rarity of epithelial cancers in captive  
1325 chimpanzees. *Philosophical Transactions of the Royal Society B: Biological Sciences*,  
1326 *370*(1673), 20140225.
- 1327 Velasco, S., Kedaigle, A. J., Simmons, S. K., Nash, A., Rocha, M., Quadrato, G., . . . Regev, A.  
1328 (2019). Individual brain organoids reproducibly form cell diversity of the human cerebral  
1329 cortex. *Nature*, *570*(7762), 523-527.
- 1330 Volkenhoff, A., Weiler, A., Letzel, M., Stehling, M., Klämbt, C., & Schirmeier, S. (2015). Glial  
1331 glycolysis is essential for neuronal survival in *Drosophila*. *Cell Metabolism*, *22*(3), 437-  
1332 447.
- 1333 Ward, M. C., & Gilad, Y. (2019). A generally conserved response to hypoxia in iPSC-derived  
1334 cardiomyocytes from humans and chimpanzees. *eLife*, *8*, e42374.
- 1335 Ward, M. C., Zhao, S., Luo, K., Pavlovic, B. J., Karimi, M. M., Stephens, M., & Gilad, Y.  
1336 (2018). Silencing of transposable elements may not be a major driver of regulatory  
1337 evolution in primate iPSCs. *Elife*, *7*, e33084.
- 1338 West, G. B., Brown, J. H., & Enquist, B. J. (2001). A general model for ontogenetic growth.  
1339 *Nature*, *413*(6856), 628.
- 1340 Wildman, D. E., Wu, W., Goodman, M., & Grossman, L. I. (2002). Episodic positive selection in  
1341 ape cytochrome c oxidase subunit IV. *Molecular Biology and Evolution*, *19*(10), 1812-  
1342 1815.
- 1343 Wu, W., Goodman, M., Lomax, M. I., & Grossman, L. I. (1997). Molecular evolution of  
1344 cytochrome c oxidase subunit IV: evidence for positive selection in simian primates.  
1345 *Journal of molecular evolution*, *44*(5), 477-491.
- 1346 Yang, Z. (2007). PAML 4: phylogenetic analysis by maximum likelihood. *Molecular Biology  
1347 and Evolution*, *24*(8), 1586-1591.
- 1348 Yu, Y., Karbowski, J., Sachdev, R. N., & Feng, J. (2014). Effect of temperature and glia in brain  
1349 size enlargement and origin of allometric body-brain size scaling in vertebrates. *BMC  
1350 Evolutionary Biology*, *14*(1), 178.
- 1351 Zhang, Y., Sloan, S. A., Clarke, L. E., Caneda, C., Plaza, C. A., Blumenthal, P. D., . . . Li, G.  
1352 (2016). Purification and characterization of progenitor and mature human astrocytes  
1353 reveals transcriptional and functional differences with mouse. *Neuron*, *89*(1), 37-53.
- 1354 Zhao, J., Davis, M. D., Martens, Y. A., Shinohara, M., Graff-Radford, N. R., Younkin, S. G., . . .  
1355 Bu, G. (2017). APOE  $\epsilon 4/\epsilon 4$  diminishes neurotrophic function of human iPSC-derived  
1356 astrocytes. *Human molecular genetics*, *26*(14), 2690-2700.
- 1357 Zheng, X., Boyer, L., Jin, M., Mertens, J., Kim, Y., Ma, L., . . . Hunter, T. (2016). Metabolic  
1358 reprogramming during neuronal differentiation from aerobic glycolysis to neuronal  
1359 oxidative phosphorylation. *Elife*, *5*, e13374.
- 1360
